# Supplementary material for: Facile preparation of nitrogen/titanium-rich porous organic polymers for specific enrichment of N-glycopeptides and phosphopeptides
Source: Royal Society of Chemistry journal article supplement (doi:10.1039/d3ay02011h), 2024-01-01
Supplement: d3ay02011h1.pdf [file d3ay02011h1.pdf]

## Supporting Information

### Experimental Details

#### Enrichment of glycopeptides/phosphopeptides from serum

For the enrichment of glycopeptides from serum, 1 mg of CH-Dha@Ti<sup>4+</sup> was ultrasonically dispersed in 100 µL of loading buffer (ACN/H<sub>2</sub>O/TFA = 90/9/1, v/v/v), 500 µg of biological sample digest were added, and the solution was shaken at 37°C for 30 min. The supernatant was removed by centrifugation and washed with loading buffer several times. Then 10 µL of eluting buffer (ACN/H<sub>2</sub>O/TFA = 30/69.9/0.1, v/v/v) was added and incubated at 37°C for 30 min and repeat it again. The eluate was collected, desalted, and lyophilized for further nano LC-MS/MS analysis.

For the enrichment of phosphopeptides from serum, 1 mg of CH-Dha@Ti<sup>4+</sup> was ultrasonically dispersed in 100 µL of loading buffer (ACN/H<sub>2</sub>O/TFA = 50/49/1, v/v/v), 500 µg of biological sample digest were added, and the solution was shaken at 37°C for 30 min. The supernatant was removed by centrifugation and washed with loading buffer several times. Then 10 µL of eluting buffer (0.4 M NH<sub>3</sub>·H<sub>2</sub>O) was added and incubated at 37°C for 30 min and repeat it again. The eluate was collected, desalted, and lyophilized for further analysis using nano LC-MS/MS.

#### MALDI-TOF MS analysis

All experiments of glycopeptides from standard protein tryptic digest by CH-Dha@Ti<sup>4+</sup> were recorded by MALDI-TOF MS (Bruker, USA). The instrument was

worked by an advanced Nd:YAG laser (355 nm), with an acceleration voltage (20kV) of TOF and a detection frequency (1000 Hz). Within the detection range of mass-to-charge ratio (1000-5000 Da), DHB (20 mg/mL, ACN/H<sub>2</sub>O = 30/70, v/v) was selected as the matrix.

## **Sample processing**

Add 20  $\mu$ L of 0.1% FA to the sample to reconstitute, shake to dissolve, centrifuge at 14000 g, and take the supernatant for testing.

## **Nano LC-MS/MS analysis**

Liquid phase A was a 0.1% formic acid aqueous solution, and B was a 0.1% formic acid acetonitrile solution (acetonitrile is 100%). Column Thermo Scientific analytical column (75  $\mu$ m $\times$ 25 cm, 5  $\mu$ m, 100  $\text{\AA}$ , C18) was equilibrated with 95% A liquid. The sample was loaded by the autosampler to the Thermo Scientific EASY trap column (100  $\mu$ m $\times$ 2 cm, 5  $\mu$ m, 100  $\text{\AA}$ , C18), and then separated by the chromatographic column. The relevant liquid gradient was as follows: from 0 min to 40 min, linear gradient of liquid B was from 5% to 28%; from 40 minutes to 42 minutes, the linear gradient of liquid B was from 28% to 90%; and from 42 minutes to 60 minutes, the liquid B was maintained at 90%. The enzymatic hydrolysis products were desalted and separated by capillary high performance liquid chromatography, and then analyzed by mass spectrometry using the Orbitrap Fusion Lumos mass spectrometer (Thermo Finnigan, San Jose, CA). Analysis time: 60min, detection method: positive ion, precursor ion scan range: 375-1800 m/z, primary mass

spectrometry resolution: 120,000 at m/z 200, scan mode: Top-Speed, AGC target:  $4e^5$ , first-level Maximum IT: 50 ms, Number of scan ranges: 1, Dynamic exclusion: 40.0 s, Data Dependent Mode: Cycle Time, Time between Master Scan: 3s. The mass-to-charge ratios of peptides and peptide fragments were collected according to the following method: the secondary spectrum scan (MS2 scan) was performed at the same time as each primary scan (Master scan), the scanning cycle was 3s, MS2 Activation Type: HCD, secondary mass spectrometry Resolution: 50,000 at m/z 200, Microscans: 1, Level 2 Maximum IT: 105 ms, AGC target:  $1e^5$ .

## **Data analysis**

The original data for mass spectrometry analysis was a RAW file, and the built-in software Proteome Discoverer 2.4 (Thermo Scientific) was used for library identification and quantitative analysis. The uniprot database is used this time: uniprot\_human\_20210621\_202249.fasta. When searching the library, submitting the RAW file to SequestHT through Proteome Discoverer, selecting the established database, and then searching the database. The search parameters were as follows: monoisotopic mass, trypsin digestion, maximum 2 missing cut sites, peptides charged number: 2<sup>+</sup>, 3<sup>+</sup> and 4<sup>+</sup>, fixed modification to carbamidomethylation (C), dynamic modification to oxidation (M), Acethyl (protein N-term) and Deamidated [N]. The maximum error of the precursor ion was 10 ppm, and the maximum error of the fragment ion was 0.05 Da. Proteome Discoverer 2.4 performs peptide high confidence screening based on the peptide identification results and outputs the results.



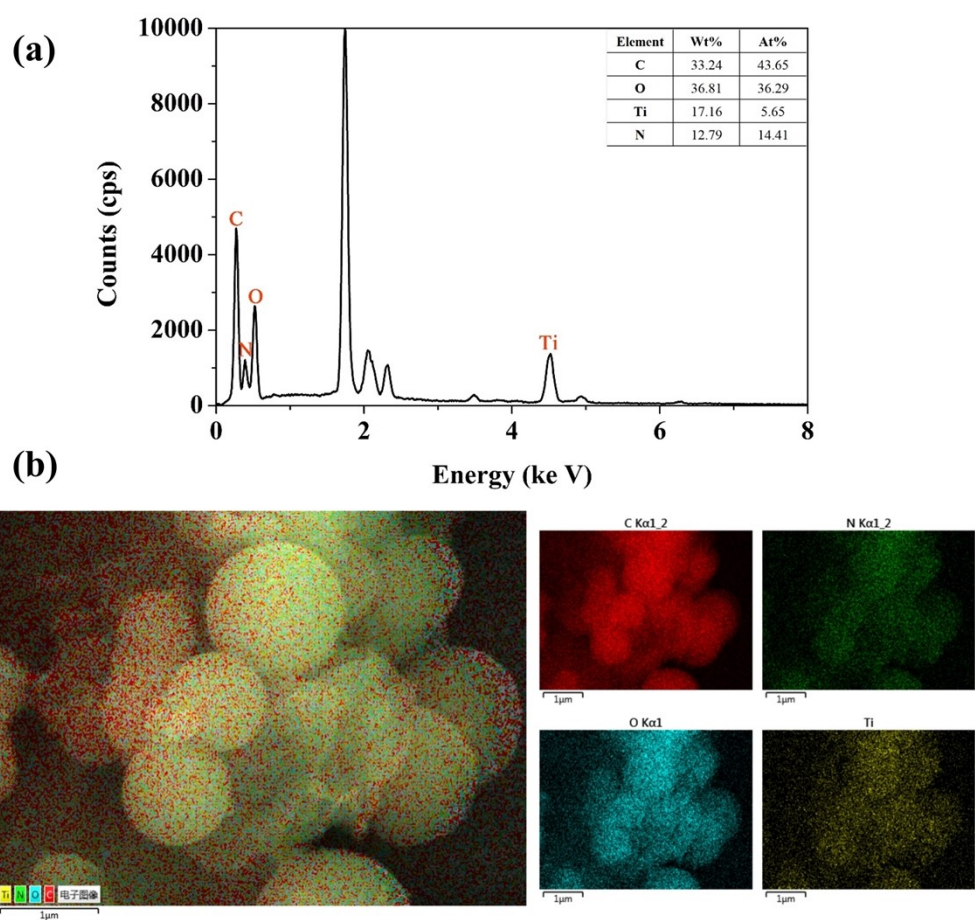

Fig. S1. (a) EDX spectrum of CH-Dha@Ti<sup>4+</sup>; (b) elemental mapping spectra of CH-Dha@Ti<sup>4+</sup>.

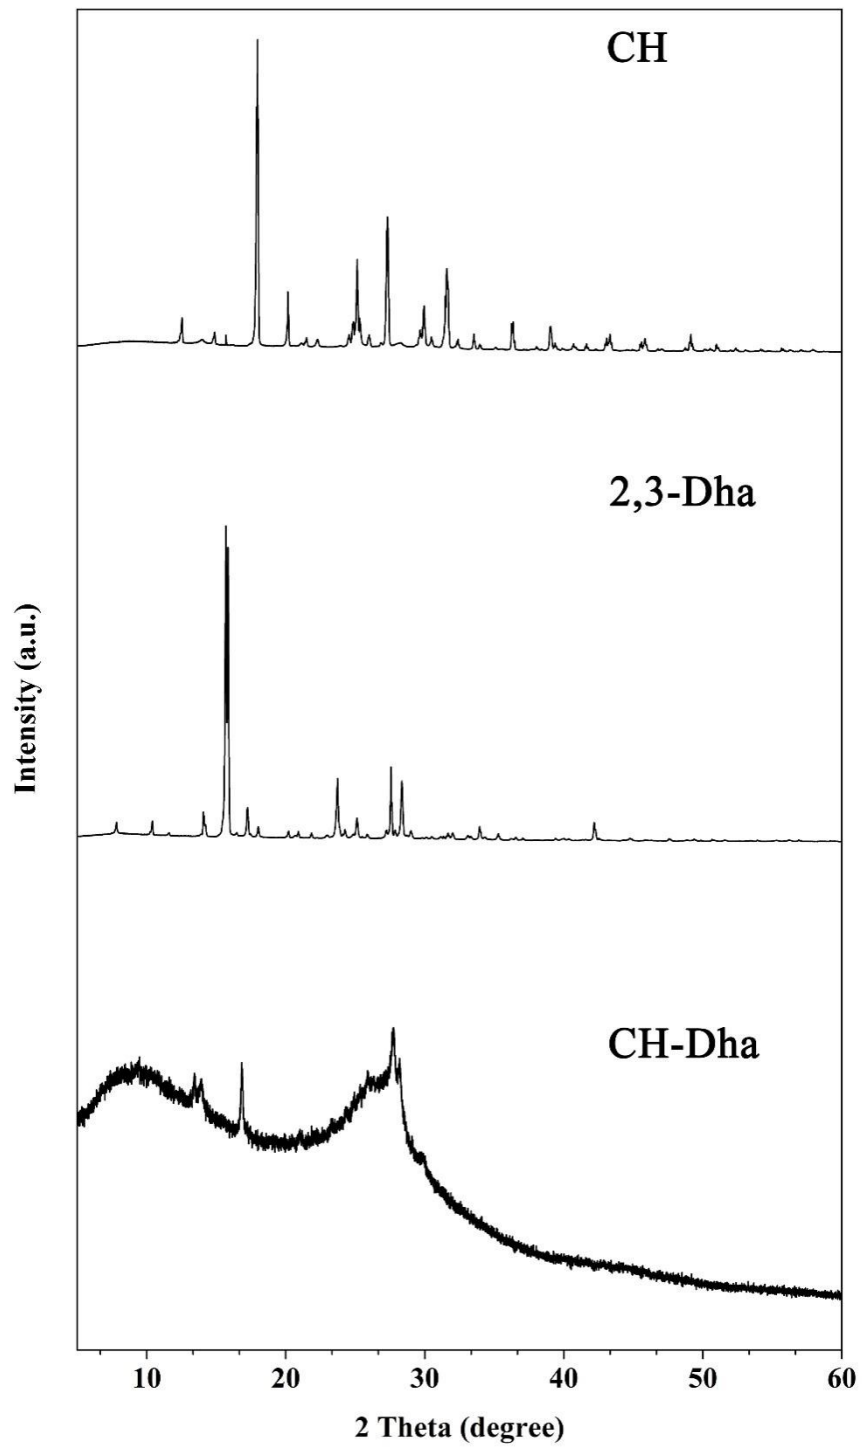

Fig. S2. The XRD patterns of CH, Dha, and CH-Dha.

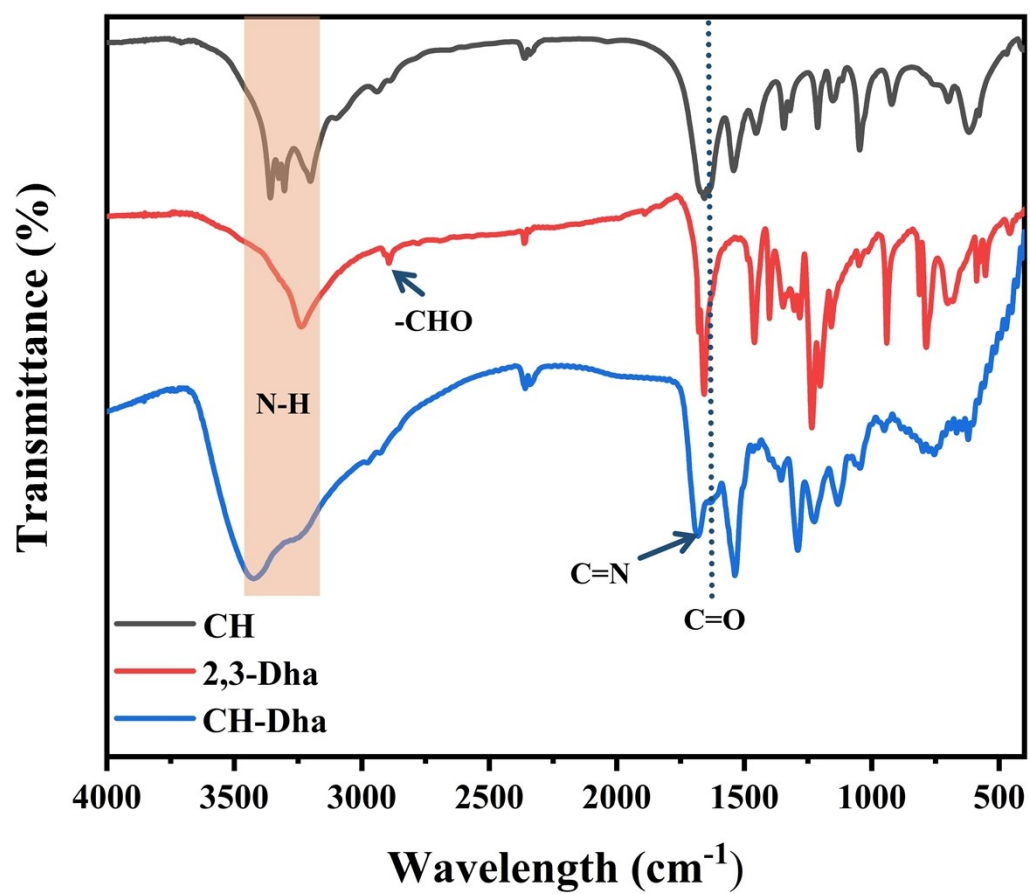

Fig. S3. The FT-IR spectra of CH-Dha@Ti<sup>4+</sup>.

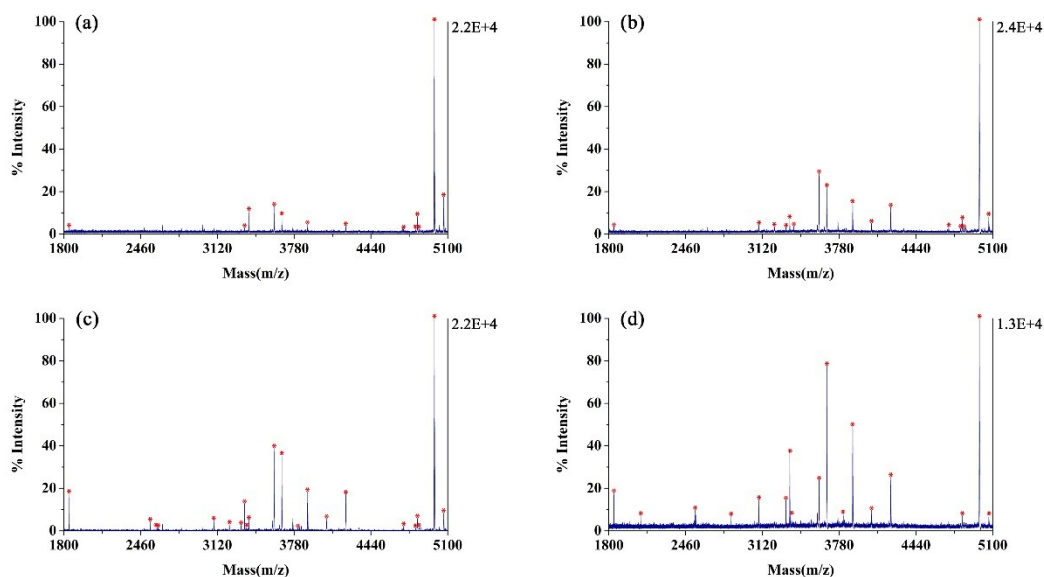

**Fig. S4.** MALDI-TOF MS spectra of glycopeptides enriched by CH-Dha@Ti<sup>4+</sup> with loading buffers of different ACN contents: (a) ACN/H<sub>2</sub>O/TFA=80/19/1; (b) ACN/H<sub>2</sub>O/TFA=85/14/1; (c) ACN/H<sub>2</sub>O/TFA=90/9/1; and (d) ACN/H<sub>2</sub>O/TFA=95/4/1. Glycopeptides peaks are signed as “\*”.

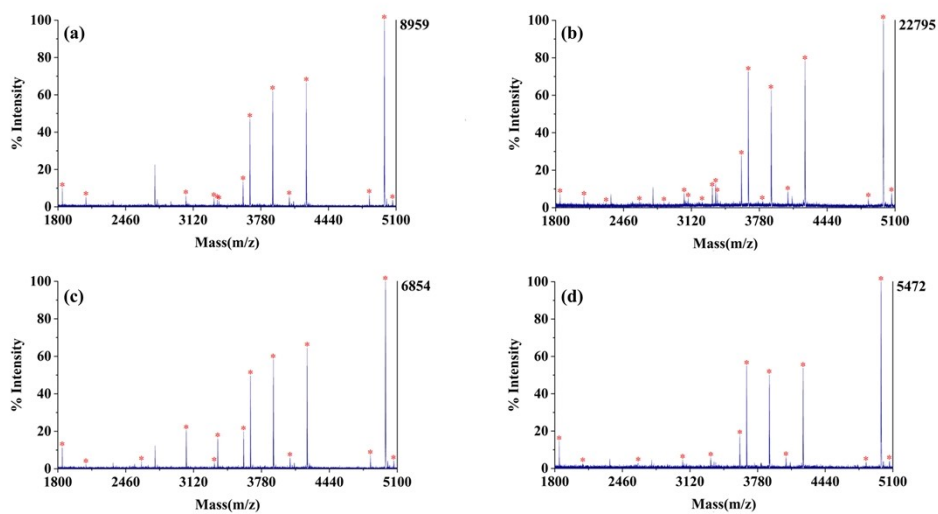

**Fig. S5.** MALDI-TOF MS spectra of glycopeptides enriched by CH-Dha@Ti<sup>4+</sup> with eluting buffers of different ACN contents: (a) ACN/H<sub>2</sub>O/TFA=15/84.9/0.1; (b) ACN/H<sub>2</sub>O/TFA=30/69.9/0.1; (c) ACN/H<sub>2</sub>O/TFA=45/54.9/0.1; and (d) ACN/H<sub>2</sub>O/TFA=60/39.9/0.1. Glycopeptides peaks are signed as “\*”.



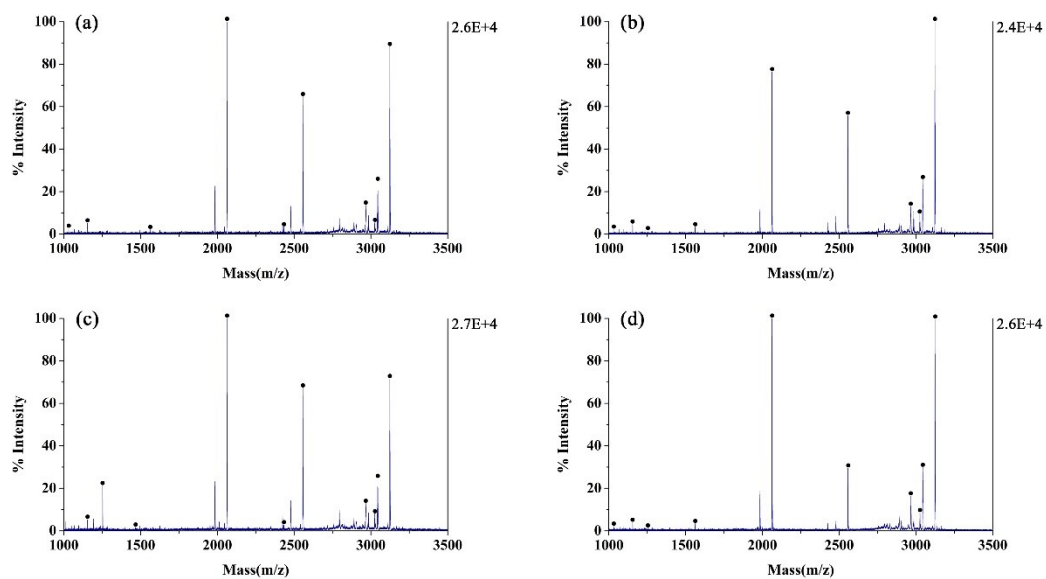

**Fig. S6.** MALDI-TOF MS spectra of phosphopeptides enriched by CH-Dha@Ti<sup>4+</sup> with loading buffers of different ACN contents: (a) ACN/H<sub>2</sub>O/TFA=50/49/1; (b) ACN/H<sub>2</sub>O/TFA=65/34/1; (c) ACN/H<sub>2</sub>O/TFA=80/19/1; and (d) ACN/H<sub>2</sub>O/TFA=95/4/1. Phosphopeptides peaks are signed as “●”.

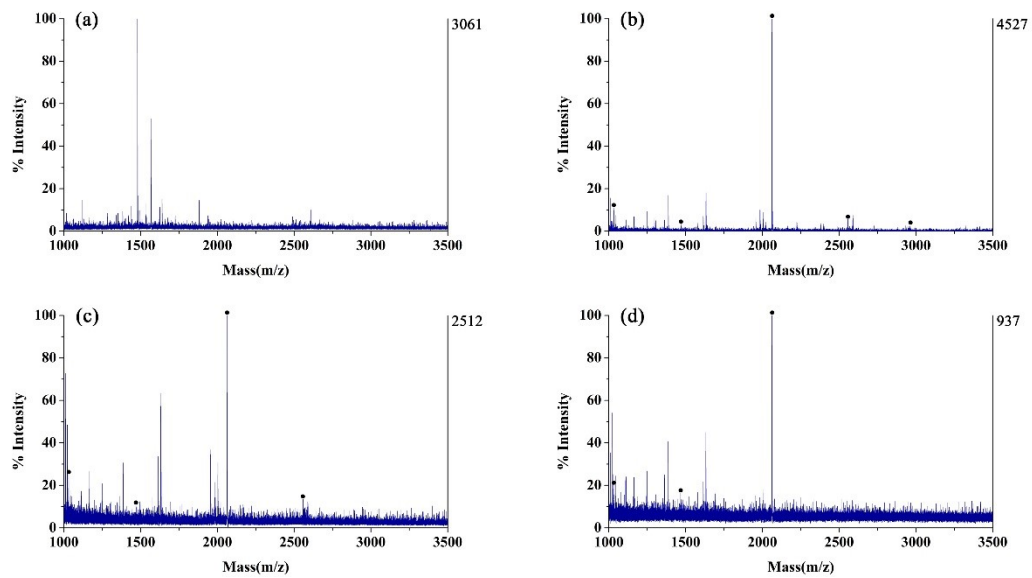

**Fig. S7.** MALDI-TOF MS spectra of the mixture of  $\beta$ -casein tryptic digest and BSA tryptic digest with a mass ratio of (a) 1:100 before the enrichment, (b) 1:100, (c) 1:500, and (d) 1:1000 after the enrichment by CH-Dha@Ti<sup>4+</sup>. Phosphopeptides peaks are signed as “●”.

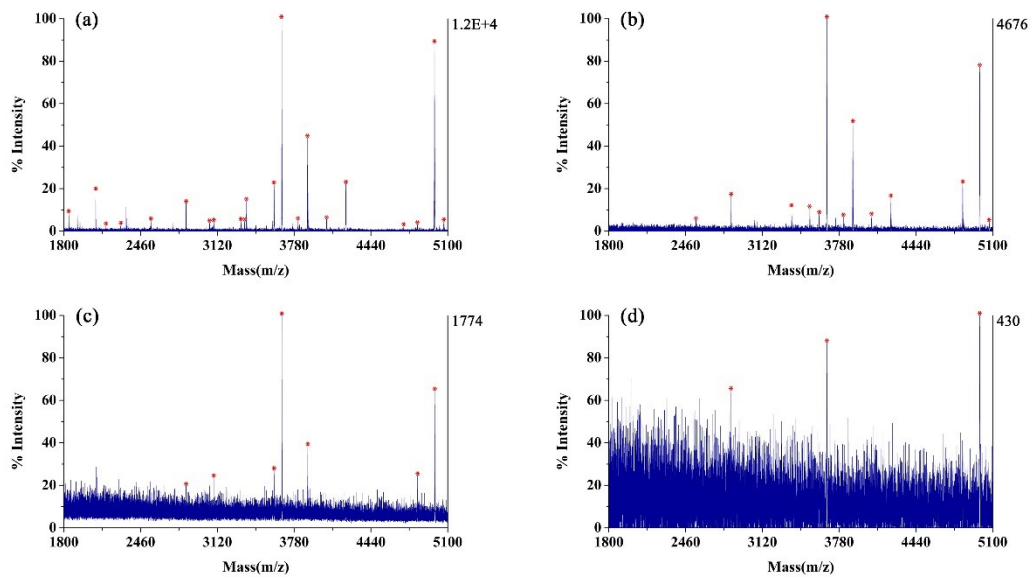

**Fig. S8.** MALDI-TOF MS spectra of HRP tryptic digest with different concentrations after the enrichment by CH-Dha@Ti<sup>4+</sup>: (a) 100 fmol/ $\mu$ L, (b) 10 fmol/ $\mu$ L, (c) 1 fmol/ $\mu$ L and (d) 0.05 fmol/ $\mu$ L. Glycopeptides peaks are signed as “\*\*”.

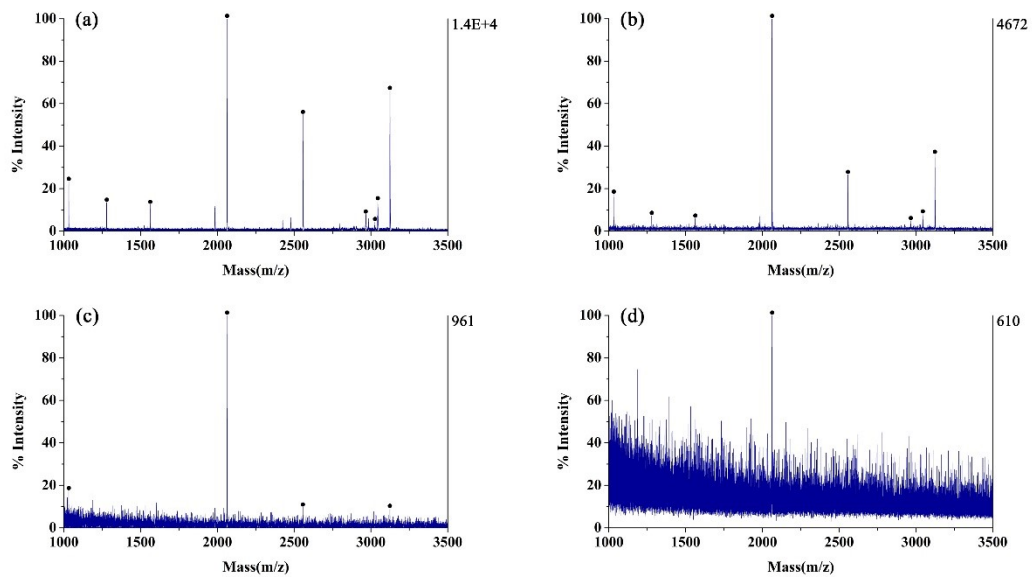

**Fig. S9.** MALDI-TOF MS spectra of  $\beta$ -casein tryptic digest with different concentrations after the enrichment by CH-Dha@Ti<sup>4+</sup>: (a) 200 fmol, (b) 20 fmol, (c) 2 fmol and (d) 0.2 fmol. Phosphopeptides peaks are signed as “●”.

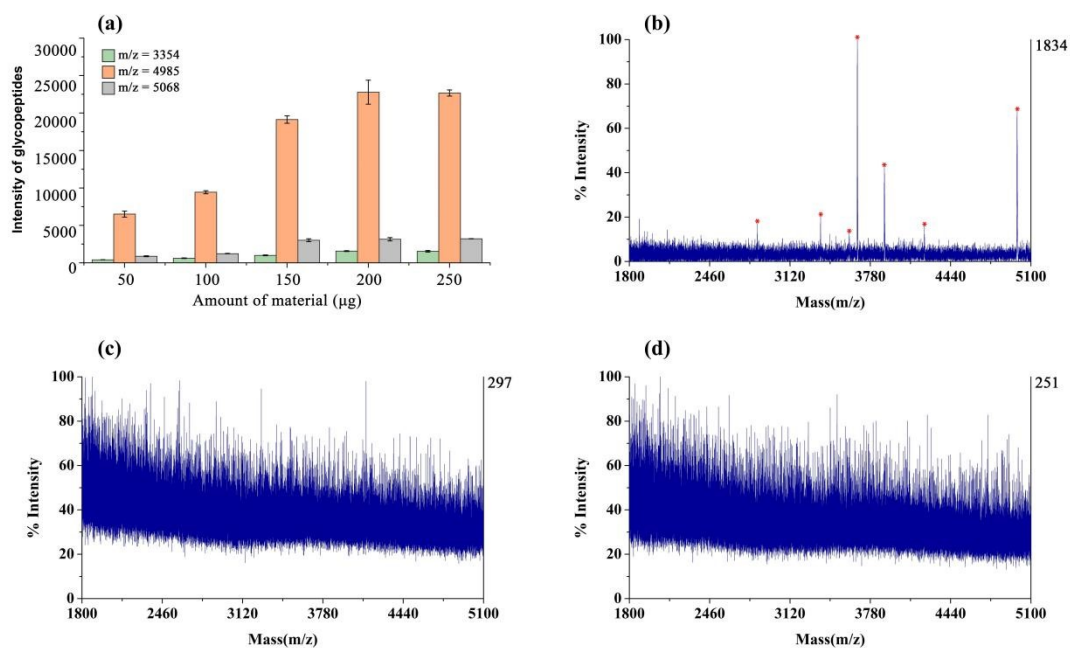

**Fig. S10.** (a) The loading capacity of CH-Dha@Ti<sup>4+</sup> on glycopeptides. MALDI-TOF MS spectra of the supernatant from the loading capacity experiment after the enrichment by CH-Dha@Ti<sup>4+</sup>: (b) 150 µg, (c) 200 µg, (d) 250 µg. Glycopeptides peaks are signed as “\*”.

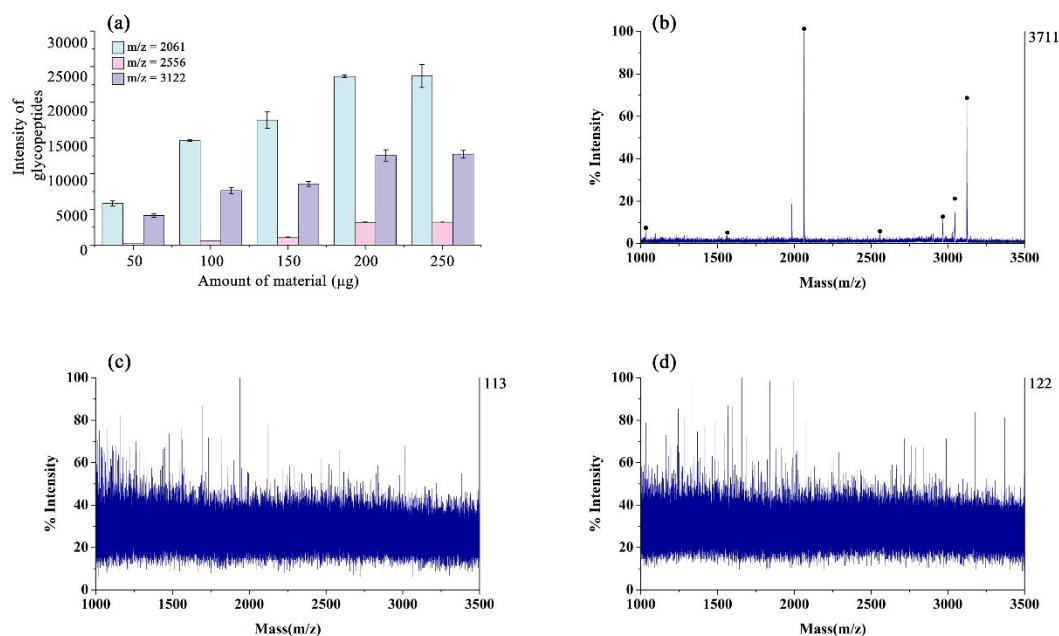

**Fig. S11.** (a) The loading capacity of CH-Dha@Ti<sup>4+</sup> on phosphopeptides. MALDI-TOF MS spectra of the supernatant from the loading capacity experiment after the enrichment by CH-Dha@Ti<sup>4+</sup>: (b) 150 µg, (c) 200 µg, (d) 250 µg. Phosphopeptides peaks are signed as “●”.

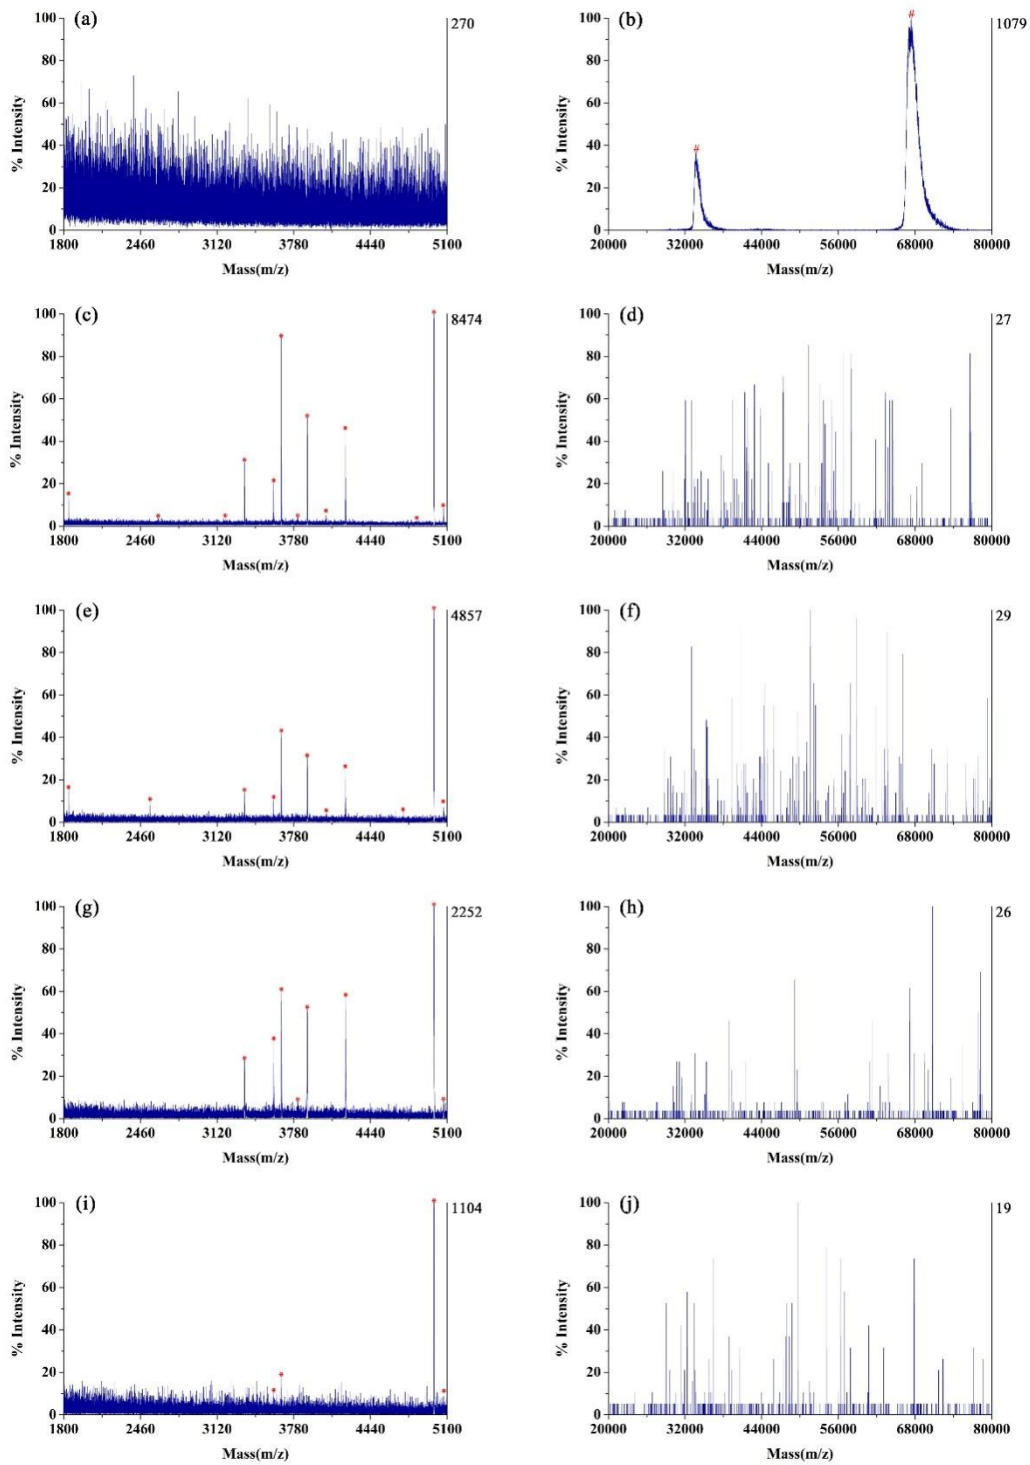

**Fig. S12.** MALDI-TOF MS spectra of the mixture of HRP tryptic digest and BSA protein with a mass ratio of (a, b) 1:100 before the enrichment, (c, d) 1:100, (e, f) 1:500, (g, h) 1:2000, and (i, j) 1:10000 after the enrichment by CH-Dha@Ti<sup>4+</sup>. Asterisk (\*) indicates peaks associated with glycopeptides.

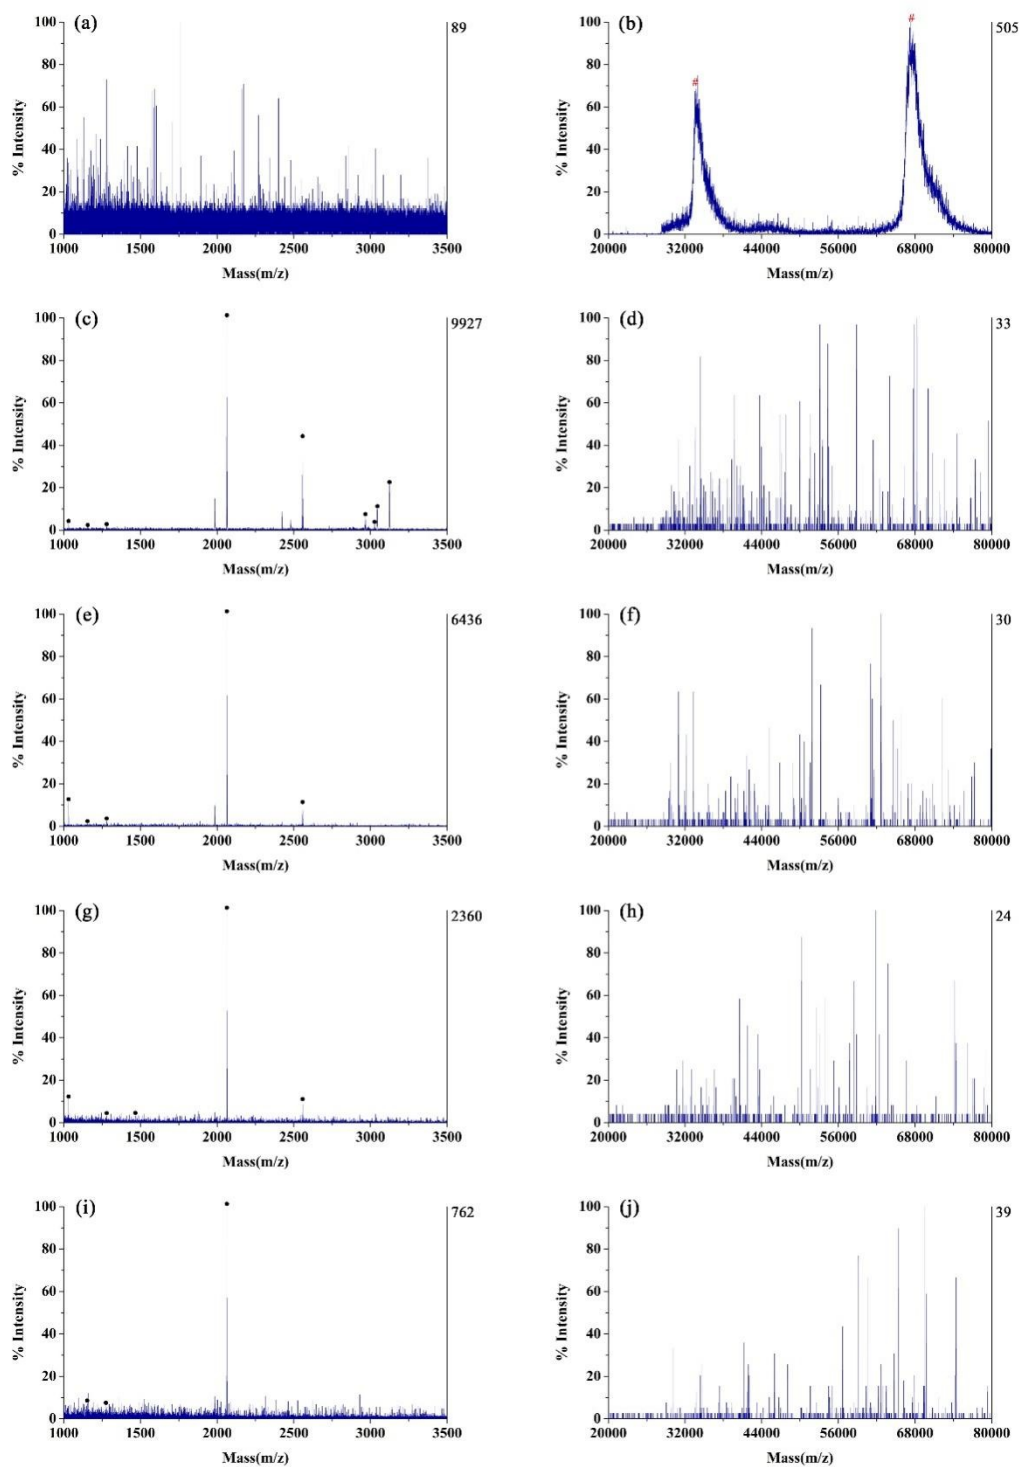

**Fig. S13.** MALDI-TOF MS spectra of the mixture of  $\beta$ -casein tryptic digest and BSA protein with a mass ratio of (a, b) 1:100 before the enrichment, (c, d) 1:100, (e, f) 1:500, (g, h) 1:2000, and (i, j) 1:10000 after the enrichment by CH-Dha@Ti<sup>4+</sup>. Phosphopeptides peaks are signed as “●”.

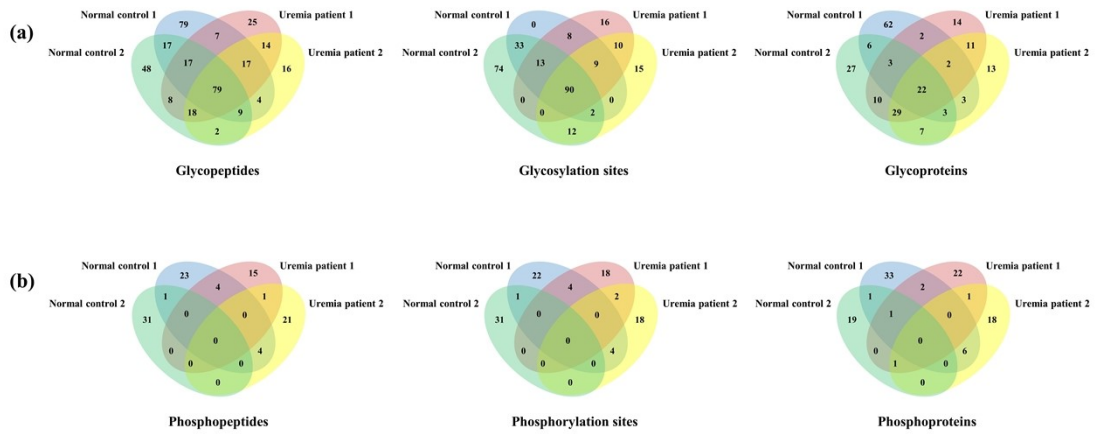

**Fig. S14.** Venn diagram of (a) glycopeptides, glycosylation sites, and proteins and (b) phosphopeptides, phosphorylation sites, and phosphoproteins identified in each isolated serum sample of uremia patients and normal controls.

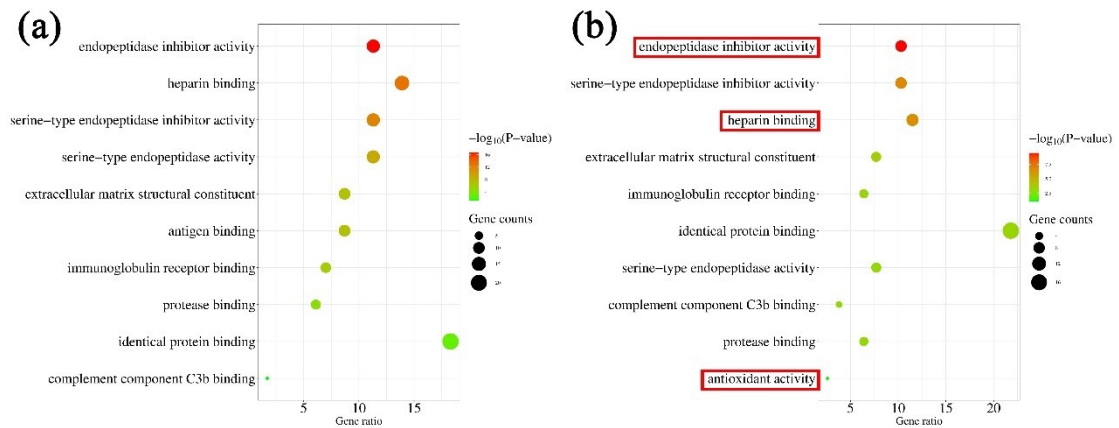

**Fig. S15.** The GO analysis of the molecular function based on the identified glycoproteins from the serum of (a) normal controls and (b) uremia patients.



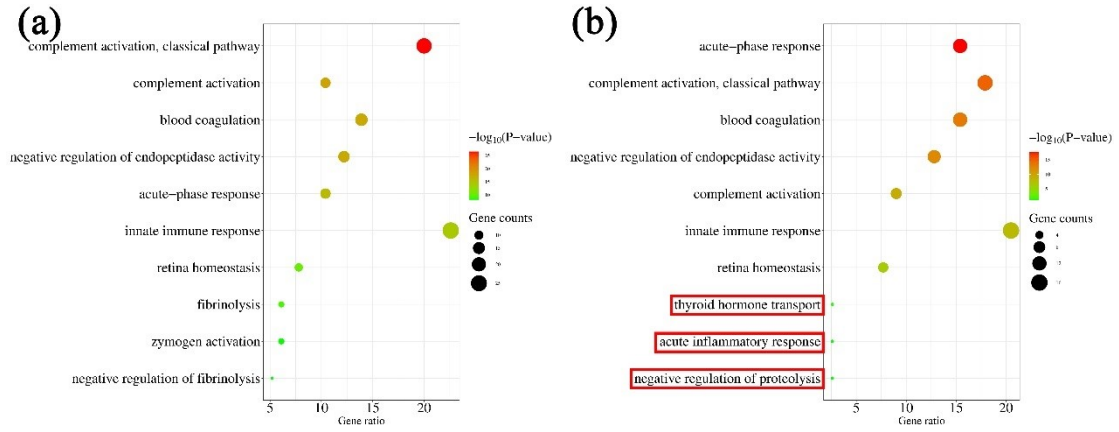

**Fig. S16.** The GO analysis of the biological process based on the identified glycoproteins from the serum of (a) normal controls and (b) uremia patients.

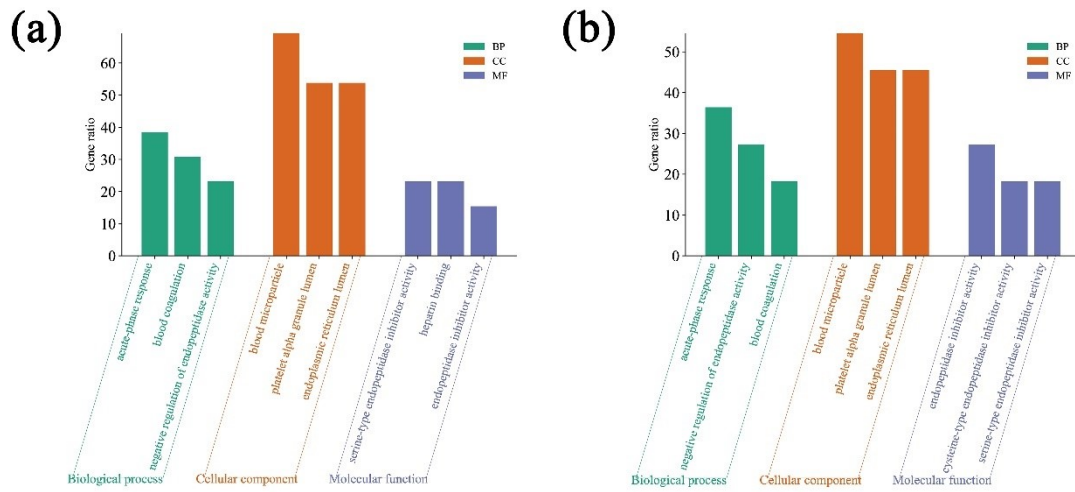

**Fig. S17.** GO analysis for the identified phosphoproteins from serum of normal controls and uremia patients.

**Table S1.** Detailed information of the observed glycopeptides derived from HRP tryptic digest after the enrichment by CH-Dha@Ti<sup>4+</sup>. N# denotes the N-glycosylation site.

| No. | Observed m/z | Sequence composition                    | Glycan | Amino acid sequence                              |
|-----|--------------|-----------------------------------------|--------|--------------------------------------------------|
| 1   | 1843.0       | XylMan3FucGlcNAc2                       |        | NVGLN#R                                          |
| 2   | 2544.5       | XylMan3FucGlcNAc2                       |        | SSPN#ATDTIPLVR                                   |
| 3   | 2591.5       | XylMan3FucGlcNAc2                       |        | PTLN#TTYLQTLR                                    |
| 4   | 2612.5       | XylMan3GlcNAc2                          |        | MGN#ITPLTGTQGQIR                                 |
| 5   | 3048.9       | XylMan2GlcNAc2                          |        | SFAN#STQTFNFAFVEAMDR                             |
| 6   | 3088.8       | XylMan3FucGlcNAc2                       |        | GLCPLNGN#LSALVDFDLR                              |
| 7   | 3190.9       | XylMan2FucGlcNAc2                       |        | SFAN#STQTFNFAFVEAMDR                             |
| 8   | 3223.8       | Man3FucGlcNAc2                          |        | SFAN#STQTFNFAFVEAMDR                             |
| 9   | 3323.9       | XylMan3FucGlcNAc2                       |        | QLTPTFYDNSCPN#VSNIVR                             |
| 10  | 3354.9       | XylMan3FucGlcNAc2                       |        | SFAN#STQTFNFAFVEAMDR                             |
| 11  | 3369.8       | XylMan3FucGlcNAc2                       |        | SFAN#STQTFNFAFVEAM*DR                            |
| 12  | 3390.9       | XylMan6Fuc2GlcNAc4                      |        | DSFRNVGLN#R                                      |
| 13  | 3606.1       | XylMan3FucGlcNAc2                       |        | NQCRGLCPLNGN#LSALVDFDLR                          |
| 14  | 3672.2       | XylMan3FucGlcNAc2                       |        | GLIQSDQELFSSPN#ATDTIPLVR                         |
| 15  | 3813.3       | XylMan3FucGlcNAc2                       |        | LHFHDCFVNGCDASILLDN#TTSFR                        |
| 16  | 3895.3       | XylMan3FucGlcNAc2                       |        | LHFHDCFVNGCDASILLDN#TTSFR                        |
| 17  | 4057.3       | XylMan3GlcNAc2                          |        | QLTPTFYDNSC(AAVESACPR)PN#VSNIVR-H <sub>2</sub> O |
| 18  | 4223.6       | XylMan3FucGlcNAc2                       |        | QLTPTFYDNSC(AAVESACPR)PN#VSNIVR                  |
| 19  | 4720.9       | Man3FucGlcNAc2,<br>Man3FucGlcNAc2       |        | LYN#FSNTGLPDPTLN#TTYLQTLR                        |
| 20  | 4824.1       | XylMan2FucGlcNAc2,<br>XylMan2GlcNAc2    |        | LYN#FSNTGLPDPTLN#TTYLQTLR                        |
| 21  | 4838.1       | XylMan3FucGlcNAc2,<br>XylMan3GlcNAc2    |        | LYN#FSNTGLPDPTLN#TTYLQTLR                        |
| 22  | 4854.1       | Man3FucGlcNAc2,<br>XylMan3FucGlcNAc2    |        | LYN#FSNTGLPDPTLN#TTYLQTLR                        |
| 23  | 4985.2       | XylMan3FucGlcNAc2,<br>XylMan3FucGlcNAc2 |        | LYN#FSNTGLPDPTLN#TTYLQTLR                        |
| 24  | 5068.1       | Xyl Man3GlcNAc2                         |        | QLTPTFYDNSC(AAVESACPR)PN#VSNIVR                  |

**Table S2.** The detailed information of phosphopeptides derived from  $\beta$ -casein tryptic digest after enrichment by CH-Dha@Ti<sup>4+</sup>. pS: Phosphorylation site.

| No. | Observed m/z | Amnio acid Sequence                   | Numbers of Phosphorylation site |
|-----|--------------|---------------------------------------|---------------------------------|
| 1   | 1031.5       | FQ[pS]EEQQQTEDELQDK                   | 1                               |
| 2   | 1154.8       | [pS] [pS]EEKFLR                       | 1                               |
| 3   | 1252.7       | TVD[Mo]ME[pS]TEVF                     | 1                               |
| 4   | 1279.1       | FQ[pS]EEQQQTEDELQDKIHFP               | 1                               |
| 5   | 1466.7       | TVDME[pS]TEVFTK                       | 1                               |
| 6   | 1964.0       | FQ[pS]EEQQQTEDELQDK                   | 1                               |
| 7   | 2062.0       | FQ[pS]EEQQQTEDELQDK                   | 1                               |
| 8   | 2556.3       | FQ[pS]EEQQQTEDELQDKIHFP               | 1                               |
| 9   | 2966.3       | ELEELNVPGEIVE[pS]L[pS][pS][pS]EESITR  | 4                               |
| 10  | 3024.6       | FPQYLQ[pY]L[pY]QGPIVLNPWDQVQR         | 2                               |
| 11  | 3042.6       | RELEELNVPGEIVE[pS]L[pS][pS][pS]EESITR | 4                               |
| 12  | 3122.6       | RELEELNVPGEIVE[pS]L[pS][pS][pS]EESITR | 4                               |

**Table S3.** The RSDs of three parallel trials on the load capacity of CH-Dha@Ti<sup>4+</sup> on glycopeptides.

| Amount of material | m/z = 3354      |         | m/z = 4985       |         | m/z = 5068      |         |
|--------------------|-----------------|---------|------------------|---------|-----------------|---------|
|                    | Average ± S. D. | RSD (%) | Average ± S. D.  | RSD (%) | Average ± S. D. | RSD (%) |
| <b>50 µg</b>       | 405.3 ± 7.4     | 1.8     | 6507.3 ± 405.0   | 6.2     | 887.3 ± 60.6    | 6.8     |
| <b>100 µg</b>      | 616.0 ± 44.3    | 7.2     | 9427.3 ± 205.1   | 2.2     | 1233.7 ± 26.6   | 2.2     |
| <b>150 µg</b>      | 998.0 ± 56.6    | 5.7     | 19123.3 ± 491.3  | 2.6     | 3014.0 ± 194.1  | 6.4     |
| <b>200 µg</b>      | 1570.7 ± 60.5   | 3.9     | 22781.3 ± 1597.8 | 7.0     | 3146.3 ± 220.6  | 7.0     |
| <b>250 µg</b>      | 1538.3 ± 104.6  | 6.8     | 22669.7 ± 407.0  | 1.8     | 3219.3 ± 20.5   | 0.6     |

**Table S4.** The RSDs of three parallel trials on the load capacity of CH-Dha@Ti<sup>4+</sup> on phosphopeptides.

| Amount of material | m/z = 2061.9     |         | m/z = 2556.8    |         | m/z = 3122.5    |         |
|--------------------|------------------|---------|-----------------|---------|-----------------|---------|
|                    | Average ± S. D.  | RSD (%) | Average ± S. D. | RSD (%) | Average ± S. D. | RSD (%) |
| 50 µg              | 5841.0 ± 325.1   | 5.6     | 183.0 ± 4.4     | 2.4     | 4127.7 ± 228.9  | 5.5     |
| 100 µg             | 14642.0 ± 106.1  | 0.7     | 621.3 ± 30.7    | 4.9     | 7646.0 ± 434.7  | 5.7     |
| 150 µg             | 17523.3 ± 1131.0 | 6.5     | 1118.0 ± 53.0   | 4.7     | 8574.3 ± 343.6  | 4.0     |
| 200 µg             | 23631.7 ± 177.5  | 0.8     | 3195.7 ± 96.6   | 3.0     | 12551.7 ± 782.0 | 6.2     |
| 250 µg             | 23689.3 ± 1625.1 | 6.9     | 3211.7 ± 95.6   | 3.0     | 12749.0 ± 517.2 | 4.1     |

**Table S5.** Enrichment efficiency comparison with previously reported materials. G: for glycopeptides. P: for phosphopeptides.

| Materials                                   | LOD (fmol)       | Selectivity (G:HRP:BSA/ P:β-casein:BSA) | Number of peptides from serum |           |
|---------------------------------------------|------------------|-----------------------------------------|-------------------------------|-----------|
| MnZnS@G6P                                   | G: 5             | G: 1:1000                               | G: 139                        | [1]       |
| mMOF@Au@GSH                                 | G: 5000          | G: 1:100                                | G: 273                        | [2]       |
| Fe <sub>3</sub> O <sub>4</sub> @CS@Au-l-Cys | G: 5000          | G: 1:1000                               | G: 63                         | [3]       |
| Hollow TiO <sub>2</sub> Spheres             | P: 0.2           | P: 1:1500                               | P: 25                         | [4]       |
| CTs@DHA@Ti <sup>4+</sup>                    | P: 2             | P: 1:2000                               | P: 14                         | [5]       |
| β-CD-COF@Ti <sup>4+</sup>                   | P: 0.5           | P: 1:1000                               | P: 29                         | [6]       |
| mTiO <sub>2</sub> @AuCG                     | G: 0.1<br>P: 0.2 | G: 1:5000<br>P: 1:1000                  | G: 167<br>P: 14               | [7]       |
| hydrazide-POPs-Ti <sup>4+</sup>             | G: 10<br>P: 0.5  | G: 1:1000<br>P: 1:2000                  | G: 201<br>P: 26               | [8]       |
| mGO/CS                                      | G: 100<br>P: 50  | G: 1:100<br>P: 1:200                    | G: 83<br>P: /                 | [9]       |
| CH-Dha@Ti <sup>4+</sup>                     | G: 5<br>P: 0.2   | G/P: 1:10000                            | G: 294<br>P: 63               | This work |

[1]. Z.H. Xie, Q.S. Feng, X. Fang, X.H. Dai, Y.H. Yan and C.F. Ding. *Microchem. J.* 2022, 178, 107397.

[2]. Q.J.Liu, C.H. Deng and N.R. Sun. *Nanoscale.* 2018, 10, 12149-12155.

[3]. B.F. Zhao, W.H. Xu, J.T. Ma and Q. Jia. *Chinese. Chem. Lett.* 2023, 34, 107498.

[4]. B.C. Wang, J.L. Du, B. Liu, Q. Xu, J.L. Huang, C.B. Liu, Y.H. Yan and C.F. Ding. *Chromatographia.* 2023, 86, 97-105.

[5]. X.Q. Sheng, X.Y. Zhang, Z.H. Xie, B. Wang, S.W. Hua, Y.T. Luo, C.F. Ding, Y.H. Yan and J. Liu. *Microchem. J.* 2023, 196, 109590.

[6]. B. Wang, X.Y. Zhang, B.C. Wang, Q.S. Feng, Y.T. Luo, W.M. Wang, C.F. Ding and Y.H. Yan. *Microchim. Acta.* 2023, 190, 399.

[7]. L.H. Yi, M.Y. Fu, Y.F. Shao, K.Q. Tang, Y.H. Yan and C.F. Ding. *J. Chromatogr. A.* 2022, 1676,

463236.

[8]. D.N. Wang, Q.S. Feng, Y.T. Luo, W.M. Wang, Y.H. Yan and C.F. Ding. *Analyst*. 2023, 148, 3392-3402.

[9]. W. Gao, F. Zhang, S. Zhang, J.Y. Li and H.Z. Lian. *ACS. Appl. Nano. Mater.* 2023, 6, 15563-15573.

**Table S6.** Details information of the identified glycopeptides enriched by CH-Dha@Ti<sup>4+</sup> from serum trypsin digests. n: N-glycosylation site.

| No.              | Protein Group Accessions | Sequence                         | MH <sup>+</sup> [Da] |
|------------------|--------------------------|----------------------------------|----------------------|
| Normal control 1 |                          |                                  |                      |
| 1                | P00738                   | QLVEIEKVVLPnYSQVDIGLIK           | 2635.471             |
| 2                | P19652                   | QNQcFYnSSYLNvQR                  | 1921.850             |
| 3                | P01009                   | QLAHQSnSTNIFFSPVSIATAFAMLSLGTK   | 3198.614             |
| 4                | P01009                   | QLAHQSnSTNIFFSPVSIATAFAMLSLGTK   | 3182.619             |
| 5                | P19652                   | QnQcFYnSSYLNvQR                  | 1922.834             |
| 6                | P04114                   | QVFPGLnYcTSGAYSnASSTDSASYPLTGDTR | 3552.538             |
| 7                | P04114                   | QVFPGLnYcTSGAYSnASSTDSASYPLTGDTR | 3551.554             |
| 8                | P04114                   | QTVnLQLQPYSLVTTLNSDLK            | 2376.266             |
| 9                | P02787                   | QQHLFGSnVTDcSGnFcLFR             | 2517.092             |
| 10               | P02787                   | QQHLFGSnVTDcSGnFcLFR             | 2516.108             |
| 11               | P06681                   | QSVPAHFVALnGSK                   | 1455.759             |
| 12               | P11597                   | nVSEDLPLPTFSPTLLGDSR             | 2159.087             |
| 13               | P0C0L4;<br>P0C0L5        | nTTcQDLQIEVTVK                   | 1649.805             |
| 14               | P01011                   | NVIFSPLSISTALAFSLGAHnTTLTEILK    | 3172.750             |
| 15               | P02768                   | QEPERnEcFLQHK                    | 1715.781             |
| 16               | P02763                   | QDQcIYnTTYLnVQREnGTISR           | 2676.221             |
| 17               | P02763                   | QDQcIYnTTYLnVQREnGTISR           | 2675.237             |
| 18               | P02763                   | QDQcIYnTTYLnVQR                  | 1917.865             |
| 19               | P02763                   | QDQcIYnTTYLNvQR                  | 1916.881             |
| 20               | Q96IY4                   | QVHFFVnASDvDNVK                  | 1719.834             |
| 21               | P04114                   | QVLFLDTVYgncSTHFTVK              | 2230.085             |

|    |                   |                                       |          |
|----|-------------------|---------------------------------------|----------|
| 22 | P01023            | SLGnVnFTVSAEAELESQELcGTEVPSVPEHGRK    | 3543.691 |
| 23 | P01023            | SLGnVnFTVSAEAELESQELcGTEVPSVPEHGR     | 3415.596 |
| 24 | P01023            | SLGNVnFTVSAEAELESQELcGTEVPSVPEHGR     | 3414.612 |
| 25 | Q02080            | RSDLPGGLAGPRGGLnTSR                   | 1881.989 |
| 26 | P01042            | ITYSIVQTncSK                          | 1414.688 |
| 27 | P22792            | LYLGSNnLTALHPALFQnLSK                 | 2316.223 |
| 28 | P04003            | LSVDKDQYVEPEEnVTIQcDSGYGVVGPQSITcSGnR | 3973.807 |
| 29 | Q03591            | LQNNEnnIScVER                         | 1591.702 |
| 30 | Q03591            | LQNNENnIScVER                         | 1590.718 |
| 31 | Q13201            | LQnLTLPTnASIK                         | 1414.779 |
| 32 | P03952            | LQAPLnYTEFQKPIcLPSK                   | 2248.168 |
| 33 | Q14624            | LPTQnITFQTESSVAEQEAEFQSPK             | 2810.337 |
| 34 | P05156            | LSDLSInSTEcLHVHcR                     | 2041.943 |
| 35 | O75882            | ISnSSDTVEcEcSEnWK                     | 2045.806 |
| 36 | P01833            | LSLLEEPGnGTFTVILNQLTSR                | 2403.277 |
| 37 | P01876;<br>P0DOX2 | LSLHRPALEDLLLGSSEAnLTcTLTGLR          | 2964.582 |
| 38 | P51884            | LSHNELADSGIPGnSFnVSSLVELDLSYNK        | 3221.548 |
| 39 | P22792            | LYLGSnnLTALHPALFQnLSK                 | 2317.207 |
| 40 | P03952            | IYPGVDFGGEELnVTFVK                    | 1984.990 |
| 41 | Q9Y6R7            | NPNnDQVFPnGTLAPSIPIWGGSWR             | 2739.316 |
| 42 | Q9Y6R7            | NPNNDQVFPnGTLAPSIPIWGGSWR             | 2738.332 |
| 43 | P04004            | nnATVHEQVGGPSLTSDLQAQSK               | 2383.137 |
| 44 | P04004            | NnATVHEQVGGPSLTSDLQAQSK               | 2382.153 |
| 45 | P00739;<br>P00738 | nLFLnHSEnATAK                         | 1461.686 |
| 46 | P00739;<br>P00738 | NLFLnHSEnATAK                         | 1460.702 |
| 47 | P00739;<br>P00738 | NLFLnHSEnATAK                         | 1459.718 |
| 48 | P02671            | nPSSAGSWnSGSSGPGSTGnR                 | 1966.801 |
| 49 | P02751-1          | NSITLTnLTPGTEYVVSIVALnGR              | 2534.335 |
| 50 | P43251            | NPVGLIGAEEnATGETDPShSK                | 2094.994 |
| 51 | O75882            | nHScSEGQISIFR                         | 1535.691 |
| 52 | P00739;<br>P00738 | mVSHHnLTTGATLINEQWLLTTAK              | 2696.371 |
| 53 | P00739;<br>P00738 | MVSHHnLTTGATLINEQWLLTTAK              | 2680.376 |
| 54 | P08603            | MDGASnVTcINSR                         | 1425.610 |
| 55 | P55058            | IYSnHSALESLALIPLQAPLK                 | 2279.265 |
| 56 | P03952            | IYSGILnLSDITK                         | 1437.784 |
| 57 | Q06033            | NAHGEEKEEnLTAR                        | 1469.698 |
| 58 | Q92954            | nGTLVAFR                              | 878.473  |
| 59 | P01854            | nGTLTVTSTLPVGTR                       | 1517.817 |
| 60 | O00391            | nGSGAVFPVAGADVQTLR                    | 1759.897 |
| 61 | P00734            | nFTENDLLVR                            | 1221.611 |
| 62 | P02768            | nEcFLQHK                              | 1076.483 |



|     |                   |                                   |          |
|-----|-------------------|-----------------------------------|----------|
| 63  | P09871            | ncGVncSGDVFTALIGEIASPnYPKYPENSR   | 3529.589 |
| 64  | P09871            | ncGVncSGDVFTALIGEIASPNYPKPYPENSR  | 3528.605 |
| 65  | P43652            | nccNTENPPGcYR                     | 1642.604 |
| 66  | Q6UXB8            | SLPNFPnTSATAnATGGR                | 1777.835 |
| 67  | P55058            | VSnVScQASVSR                      | 1294.606 |
| 68  | P01023            | VSnQTLSLFFTlQDVPVR                | 2164.165 |
| 69  | P36955            | VTQnLTLIEESLTSEFIHDIDR            | 2574.293 |
| 70  | P07996            | VVnSTTGPEHLR                      | 1367.691 |
| 71  | P27169            | VTQVYAE nGTVLQGSTVASVYK           | 2315.177 |
| 72  | P00738            | VVLHPnYSQVDIGLIK                  | 1795.995 |
| 73  | P05155            | VLSnNSDANLELINTWVAK               | 2102.076 |
| 74  | P04196            | VIDFncTTSSVSSALAnTK               | 2016.943 |
| 75  | P04196            | VIDFncTTSSVSSALANTK               | 2015.959 |
| 76  | P05155            | VLSnnSDANLELINTWVAK               | 2103.060 |
| 77  | P04114            | VHnGSEILFSYFQDLVITLPFELR          | 2838.471 |
| 78  | P05155            | VGQLQLSHnLSLVILVPQnLK             | 2315.333 |
| 79  | Q6UX71            | VnLSFDFPFYGHFLR                   | 1859.912 |
| 80  | P01833            | VPGnVTAVLGETLK                    | 1398.784 |
| 81  | P04114            | VNQNLVYESGSLnFSK                  | 1799.881 |
| 82  | P05155            | VGQLQLSHnLSLVILVPQNLK             | 2314.349 |
| 83  | Q9Y6R7            | YLPVnSLLTSDcSER                   | 1841.859 |
| 84  | P01009            | YLGnATAIFFLPDEGKLQHLENELTHDIITK   | 3541.821 |
| 85  | P01009            | YLGnATAIFFLPDEGK                  | 1756.879 |
| 86  | P01871            | YKnnSDISSTR                       | 1286.586 |
| 87  | P01871            | YKnNSDISSTR                       | 1285.602 |
| 88  | P00734            | YPHKPEInSTTHPGADLQENFcR           | 2712.247 |
| 89  | P01042            | YNSQnQSNNQFVLYR                   | 1875.862 |
| 90  | P01011            | YTGnASALFILPDQDK                  | 1753.864 |
| 91  | P02763;<br>P19652 | WFYIASAFRnEEYnK                   | 1939.886 |
| 92  | P02763;<br>P19652 | WFYIASAFRN EEEYnK                 | 1938.902 |
| 93  | P41222            | WFSAGLASnSSWLR                    | 1582.765 |
| 94  | Q16609            | WEYcnLTR                          | 1142.494 |
| 95  | P02749            | VYKPSAGnNSLYR                     | 1470.722 |
| 96  | P02749            | VYKPSAGnNSLYR                     | 1469.738 |
| 97  | P04114            | YDFnSSMLYSTAK                     | 1527.667 |
| 98  | P43652            | YAEDKF nETTEK                     | 1475.654 |
| 99  | P01008            | WVSnKTEGR                         | 1077.532 |
| 100 | P06276            | WSDIWnATK                         | 1121.526 |
| 101 | Q9Y6R7            | VVTVAALGTnISIHKDEIGK              | 2066.149 |
| 102 | P02788            | TAGWnVPIGTLRPFLnWTGPPEPIEAAVAR    | 3232.679 |
| 103 | P01859            | TKPREEQFnSTFR                     | 1640.803 |
| 104 | P01871            | THTnISESHPnATFSAVGEASl cEDDWnSGER | 3521.467 |
| 105 | P01871            | THTnISESHPnATFSAVGEASl cEDDWNSGER | 3520.483 |

|     |                   |                                    |          |
|-----|-------------------|------------------------------------|----------|
| 106 | P0DOX6            | THTnISESHPhnATFSAVGEASlcEDDDWSGER  | 3521.467 |
| 107 | P01023            | TEVSSNHVLIYLDKVSnnQTLSLFFTVLQDVPVR | 3762.995 |
| 108 | P29622            | SQILEGLGFnLTELSESDVHR              | 2345.162 |
| 109 | P00751            | SPYYnVSDEISFHcYDGYTLR              | 2587.108 |
| 110 | P08603            | SPDVInGSPISQK                      | 1342.685 |
| 111 | P01008            | SLTFnETYQDISELVYGAK                | 2179.044 |
| 112 | P80188            | SYnVTSVLFR                         | 1186.610 |
| 113 | P02790            | SWPAVGncSSALR                      | 1405.653 |
| 114 | P41222            | SVVAPATDGGLnLTSTFLR                | 1920.007 |
| 115 | P02763;<br>P19652 | SVQEIQATFFYFTPhnKTEDTIFLR          | 2896.440 |
| 116 | P0DOX6;<br>P01871 | STGKPTLYnVSLVMSDTAGTcY             | 2366.089 |
| 117 | P0DOX5            | TKPREEQYnSTYR                      | 1672.793 |
| 118 | P02679            | VDKDLQSLEDILHQVEnKTSEVK            | 2668.368 |
| 119 | P02679            | VDKDLQSLEDILHQVEnK                 | 2124.082 |
| 120 | P02765            | VcQDcPLLAPLnDTR                    | 1772.831 |
| 121 | P12259            | TWnQSIALR                          | 1089.569 |
| 122 | P01024            | TVLTPATNHMGnVTFTIPANR              | 2256.144 |
| 123 | O75636            | VELEDFnGnR                         | 1194.527 |
| 124 | O75636            | VELEDFNGnR                         | 1193.543 |
| 125 | O75044            | TnATSPGVNSSTSPQSTDKScTV            | 2327.030 |
| 126 | P0DOX2            | TPLTAnITK                          | 959.541  |
| 127 | P04275            | TTcnPcPLGYKEEnNTGEccGR             | 2619.021 |
| 128 | P05155            | DTFVnASR                           | 910.426  |
| 129 | Q04756            | DSVSVVLGQHFFnR                     | 1605.802 |
| 130 | P01861            | EEQFnSTYR                          | 1174.501 |
| 131 | P01859            | EEQFnSTFR                          | 1158.506 |
| 132 | P10909            | EDALnETR                           | 948.427  |
| 133 | P25311            | DIVEYYnDSnGSHVLQGR                 | 2067.925 |
| 134 | P25311            | DIVEYYNDSnGSHVLQGR                 | 2066.941 |
| 135 | P02679            | DLQSLEDILHQVEnK                    | 1781.892 |
| 136 | P43652            | DIENFnSTQK                         | 1196.543 |
| 137 | P02751-1          | DQcIVDDITYNVnDTFHK                 | 2197.971 |
| 138 | P14151            | DnYTDLVAIQNK                       | 1394.680 |
| 139 | P06276            | DnNSIITR                           | 933.464  |
| 140 | P01860            | EEQYnSTFR                          | 1174.501 |
| 141 | P0DOX5            | EEQYnSTYR                          | 1190.496 |
| 142 | P02743            | ESVTDHVnLITPLEKPLQnFTLcFR          | 2973.503 |
| 143 | P02743            | ESVTDHVnLITPLEKPLQnFTLcFR          | 2972.519 |
| 144 | P20851            | EWDnTTTEcR                         | 1312.511 |
| 145 | P00450            | EHEGAIYPDnTTDFQR                   | 1893.825 |
| 146 | P49908            | EGYSnISYIVVNHQGISSR                | 2124.036 |
| 147 | P00450            | ELHHLQEQnVSNAFLDK                  | 2022.988 |
| 148 | P00450            | EnLTAPGSDSAVFFEQGTTR               | 2127.983 |

|     |          |                                  |          |
|-----|----------|----------------------------------|----------|
| 149 | P01591   | EnISDPTSPLR                      | 1229.601 |
| 150 | P06276   | EnETEIIK                         | 976.483  |
| 151 | P00450   | ELHHLQEQnVSNAFLDKGEFYIGSK        | 2904.416 |
| 152 | P00450   | AGLQAFFQVQEcnK                   | 1640.774 |
| 153 | Q9HDC9   | AGPnGTLFVADAYK                   | 1424.706 |
| 154 | P22792   | AFGSNPnLTK                       | 1049.526 |
| 155 | P51884   | AFEnVTDLQWLILDHNLENSK            | 2613.320 |
| 156 | P02766   | ALGISPFHEHAEVVFTAnDSGPRR         | 2608.290 |
| 157 | P02766   | ALGISPFHEHAEVVFTAnDSGPR          | 2452.189 |
| 158 | O75882   | AATcINPLnGSVcERPAnHSAK           | 2369.097 |
| 159 | Q08380   | AAIPSALDTnSSK                    | 1275.643 |
| 160 | P02765   | AALAAFNAQnNnGSNFQLEEISR          | 2366.137 |
| 161 | P01009   | ADTHDEILEGLNFnLTEIPEAQIHEGFQELLR | 3692.808 |
| 162 | P05090   | ADGTVnQIEGEATPVnLTEPAKLEVK       | 2725.378 |
| 163 | P05090   | ADGTVnQIEGEATPVnLTEPAKLEVK       | 2724.394 |
| 164 | P05090   | ADGTVnQIEGEATPVnLTEPAK           | 2256.088 |
| 165 | P05090   | ADGTVnQIEGEATPVnLTEPAK           | 2255.104 |
| 166 | P49908   | cGncSLTTLK                       | 1154.518 |
| 167 | P02787   | cGLVPVLAENYnK                    | 1477.736 |
| 168 | Q04756   | cFLGnGTGYR                       | 1145.504 |
| 169 | P23142   | cATPHGDnASLEATFVK                | 1818.833 |
| 170 | O75882   | cInQSIcEK                        | 1152.502 |
| 171 | Q08380   | DAGVVcTnETR                      | 1222.537 |
| 172 | P00736   | cnYSIR                           | 813.356  |
| 173 | P02748   | AVnITSENLIDDVVSLIR               | 1972.060 |
| 174 | Q86VB7   | APGWAnSSAGSGR                    | 1218.550 |
| 175 | Q9Y5Y7   | ANQQLnFTEAK                      | 1264.617 |
| 176 | P02790   | ALPQPQnVTSLLGcTH                 | 1736.864 |
| 177 | P05164   | ALLPFDNLHDDPcLLTnR               | 2125.038 |
| 178 | P08185   | AVLQLNEEGVDTAGSTGVTLnLTSKPIILR   | 3110.694 |
| 179 | P10909   | LAnLTQGEDQYYLR                   | 1684.818 |
| 180 | P01876   | LAGKPTHVnVSVVMAEVDGTcY           | 2348.126 |
| 181 | P04114   | LATALSLSNKFVEGSHnSTVSLTTK        | 2606.367 |
| 182 | P04278   | LDVDQALnR                        | 1044.532 |
| 183 | O75882   | IDSTGnVTNELR                     | 1319.644 |
| 184 | P02751-1 | LDAPTNLQFVnETDSTVLVR             | 2233.135 |
| 185 | Q9Y5Y7   | KANQQLnFTEAK                     | 1392.712 |
| 186 | P0DOX2   | HYTnSSQDVTVPcR                   | 1664.733 |
| 187 | P01011   | KLINDYVKnGTR                     | 1421.775 |
| 188 | P02750   | KLPPGLLAnFTLLR                   | 1553.941 |
| 189 | P02765   | KVcQDcPLLAPLnDTR                 | 1900.926 |
| 190 | P08603   | IPcSQPPQIEHGTInSSR               | 2021.971 |
| 191 | P01042   | LNAEnnATFYFK                     | 1433.658 |
| 192 | P01042   | LNAENnATFYFK                     | 1432.674 |

|                  |                   |                                      |          |
|------------------|-------------------|--------------------------------------|----------|
| 193              | P02749            | LGnWSAMPScK                          | 1251.550 |
| 194              | P20851            | LGHCPDPVLVnGEFSSSGPVnVSDK            | 2613.214 |
| 195              | P20851            | LGHcPDPVLVNGEFSSSGPVnVSDK            | 2612.230 |
| 196              | P02749            | LGnWSAMPScK                          | 1267.545 |
| 197              | P01008            | LGAcnDTLQQLMEVFKFDTISEK              | 2688.290 |
| 198              | P01008            | LGAcnDTLQQLMEVFK                     | 1867.893 |
| 199              | P04275            | IGEADFnR                             | 922.426  |
| 200              | P51884            | LGSFEGLVnLTFIHLQHNR                  | 2196.156 |
| 201              | P04114            | FVEGSHnSTVSLTTK                      | 1607.791 |
| 202              | P0DOX5            | FTISRnDSK                            | 1068.532 |
| 203              | P01033            | FVGTPEVnQTTLYQR                      | 1753.876 |
| 204              | P04003            | FSLLGHASIScTVEnETIGVWRPSPPTcEK       | 3373.619 |
| 205              | P07357            | GGSSGWSGGLAQnR                       | 1334.608 |
| 206              | Q96PD5            | GFGVAIVGnYTAALPTEAALR                | 2092.107 |
| 207              | P01023            | GcVLLSYLnETVTVSASLESVR               | 2398.217 |
| 208              | P19823            | GAFISnFSMTVDGK                       | 1474.688 |
| 209              | P0C0L4;<br>P0C0L5 | FSDGLESnSSTQFEVK                     | 1775.797 |
| 210              | P05156            | FLnnGTCTAEGK                         | 1313.568 |
| 211              | P05156            | FLNnGTcTAEGK                         | 1312.584 |
| 212              | P25311            | FGCEIEnnR                            | 1140.463 |
| 213              | P25311            | FGcEIENnR                            | 1139.479 |
| 214              | P04114            | FEVDSPVYnATWSASLK                    | 1914.912 |
| 215              | Q9BTA9-3          | FLTAGPSAFnITSLISQAAQLSTQDIPLHEGIQMER | 3885.969 |
| 216              | P43251            | FnDTEVLQR                            | 1122.543 |
| 217              | P04114            | FnSSYLQGTnQITGR                      | 1687.792 |
| 218              | P04114            | FnSSYLQGTNQITGR                      | 1686.808 |
| 219              | Q13201            | FNPGAESVVLsnSTLK                     | 1663.854 |
| 220              | P01011            | FnLTETSEAEIHQSFQHLLR                 | 2401.178 |
| 221              | P55083            | FnGSVSFFR                            | 1061.505 |
| 222              | P27169            | HAnWTLTPLK                           | 1181.631 |
| 223              | P05155            | GVTSVSQIFHSPDLAIRDTFVnASR            | 2718.385 |
| 224              | Q86VB7            | GnESALWDcK                           | 1180.494 |
| 225              | P0DOX6;<br>P01871 | GLTFQQnASSMcVPDQDTAIR                | 2340.059 |
| 226              | P04275            | GLQPTLTNPGEcRPhFTcAcR                | 2450.101 |
| 227              | P0C0L4;<br>P0C0L5 | GLnVTLSSSTGRnGFK                     | 1552.797 |
| 228              | P0C0L4;<br>P0C0L5 | GLnVTLSSSTGR                         | 1105.585 |
| 229              | Q08380            | GLnLTEDTYKPR                         | 1407.711 |
| 230              | P01011            | GLKFnLTETSEAEIHQSFQHLLR              | 2699.379 |
| 231              | P17936            | GLcVnASAVSR                          | 1134.557 |
| 232              | P26927            | GTAAnTTTAGVPcQR                      | 1434.664 |
| 233              | P02675            | GTAGNALMDGASQLMGEEnR                 | 1893.843 |
| Normal control 2 |                   |                                      |          |

|    |                                              |                                               |          |
|----|----------------------------------------------|-----------------------------------------------|----------|
| 1  | A0A140VJJ6                                   | VDKDLSLEDILHQVEnKTSEVK                        | 2668.368 |
| 2  | Q9NPP6;<br>A0A286YEY<br>5; Q6N092;<br>Q8NCL6 | LSLHRPALEDLLLGSEAnLTcTLTGLR                   | 2964.582 |
| 3  | A0A384MDQ<br>7; P01009                       | KLSSWVLLMKYLGnATAIFFLPDEGKLQHLENELTHDIIT<br>K | 4727.516 |
| 4  | A0A384MDQ<br>7; P01009                       | YLGnATAIFFLPDEGKLQHLENELTHDIITK               | 3541.821 |
| 5  | A0A384N669                                   | LGSFEGLVnLTFIHLQHNR                           | 2196.156 |
| 6  | P22792                                       | LYLGSNnLTALHPALFQnLSK                         | 2316.223 |
| 7  | P01871                                       | THTnISESHPnATFSAVGEASiCEDDWNSGER              | 3520.483 |
| 8  | Q96PD5                                       | LEPVHLQLQcMSQEQLAQVAAnATK                     | 2808.402 |
| 9  | A5PL27                                       | ELHHLQEQnVSNAFLDKGEFYIGSK                     | 2904.416 |
| 10 | D9IWP9                                       | DTAVFEcLPQHAMFGnDTITcTTHGnWTK                 | 3354.450 |
| 11 | A0A024R6P0                                   | GLKFnLTETSEAEIHQSFQHLLR                       | 2699.379 |
| 12 | B4E1Z4                                       | SPYYnVSDEISFHcYDGYTLR                         | 2587.108 |
| 13 | A0A140VK00                                   | AREDIFMETLKDIVEYYNDSnGSHVLQGR                 | 3400.611 |
| 14 | A0A024R6P0                                   | FnLTETSEAEIHQSFQHLLR                          | 2401.178 |
| 15 | P00739;<br>P00738                            | MVSHHnLTTGATLInEQWLLTTAK                      | 2681.360 |
| 16 | P20851                                       | LGHcPDPVLVnGEFSSSGPVnVSDK                     | 2613.214 |
| 17 | A0A140VK00                                   | AREDIFMETLKDIVEYYnDSnGSHVLQGR                 | 3401.595 |
| 18 | P29622                                       | SQILEGLGFnLTELSESDVHR                         | 2345.162 |
| 19 | P00738                                       | VVLHPnYSQVDIGLIK                              | 1795.995 |
| 20 | P01023                                       | SLGNVnFTVSAEALESQELcGTEVPSVPEHGRK             | 3542.707 |
| 21 | Q5UGI6                                       | GVTSVSQIFHSPDLAIRDTFVnASR                     | 2718.385 |
| 22 | G3V387                                       | ADTHDEILEGLNFnLTEIPEAQIH                      | 2720.305 |
| 23 | P09871                                       | NcGVncSGDVFTALIGEIASPNYPKYPENSR               | 3527.621 |
| 24 | X6RLJ0                                       | RNPPMGGNVVIFDVTITNQEOPYQnHSGR                 | 3270.560 |
| 25 | P00739;<br>P00738                            | mVSHHnLTTGATLINEQWLLTTAK                      | 2696.371 |
| 26 | C9JF17                                       | ADGTVNQIEGEATPVnLTEPAKLEVK                    | 2724.394 |
| 27 | A0A140VJJ6                                   | DLQSLEDILHQVEnKTSEVK                          | 2326.177 |
| 28 | A0A024R462                                   | DQcIVDDITYNVnDTFHK                            | 2197.971 |
| 29 | D9ZGG2                                       | nnATVHEQVGGPSLTSDLQAQSK                       | 2383.137 |
| 30 | A0A384MDQ<br>7; P01009                       | YLGnATAIFFLPDEGKLQHLEnELTHDIITK               | 3542.805 |
| 31 | P01023                                       | VSnQTLSLFFTVLQDVPVR                           | 2164.165 |
| 32 | P02743                                       | ESVTDHVNLIITPLEKPLQnFTLcFR                    | 2972.519 |
| 33 | P00738                                       | QLVEIEKVVLHPnYSQVDIGLIK                       | 2635.471 |
| 34 | B2RMS9                                       | LPTQnITFQTESSVAEQEAQSPK                       | 2810.337 |
| 35 | P01023                                       | SLGNVnFTVSAEALESQELcGTEVPSVPEHGR              | 3414.612 |
| 36 | A0A384MDQ<br>7; P01009                       | ADTHDEILEGLNFnLTEIPEAQIHEGFQELLR              | 3692.808 |
| 37 | C9JF17                                       | ADGTVnQIEGEATPVnLTEPAKLEVK                    | 2725.378 |
| 38 | A0A087WT5<br>9                               | ALGISPFHEHAEVVFTAnDSGPRR                      | 2608.290 |
| 39 | P01008                                       | LGAcnDTLQQLmEVFKFDTISEK                       | 2704.284 |

|    |                                  |                                             |          |
|----|----------------------------------|---------------------------------------------|----------|
| 40 | P05156                           | LSDLSInSTEcLHVHcR                           | 2041.943 |
| 41 | A0A140VK00                       | DIVEYYnDSnGSHVLQGR                          | 2067.925 |
| 42 | A0A384MDQ7;<br>G3V387;<br>P01009 | QLAHQSnStnIFFSPVSIATAFAmLSLGTK              | 3199.598 |
| 43 | P49908                           | EGYSnISYIVVNHQGISSR                         | 2124.036 |
| 44 | P04003                           | FSLLGHASIScTVEEnETIGVWRPSPPTcEK             | 3373.619 |
| 45 | A0A384N669                       | LSHNELADSGIPGNSFnVSSLVELDLSYNK              | 3220.564 |
| 46 | P01023                           | SLGnVnFTVSAEALESQELcGTEVPSVPEHGR            | 3415.596 |
| 47 | A5PL27                           | EHEGAIYPDnTTDFQR                            | 1893.825 |
| 48 | A0A024R6P0                       | YTGnASALFILPDQDKMEEVEAMLLPETLKR             | 3523.770 |
| 49 | P02765                           | AALAAFNAQnnGSNFQLEEISR                      | 2367.121 |
| 50 | C0JYY2                           | FEVDSPVYnATWSASLK                           | 1914.912 |
| 51 | P02765                           | KVcQDcPLLAPLnDTR                            | 1900.926 |
| 52 | Q8NF20                           | EVnTSGFAPARPPPQPGSTTFWAWSVLR                | 3057.522 |
| 53 | A0A024R6P0                       | TLnQSSDELQLSMGNAMFVKEQLSLLDRFTEDAKR         | 4015.974 |
| 54 | P02790                           | ALPQPQnVTSLLGcTH                            | 1736.864 |
| 55 | A5PL27                           | ELHHLQEQnVSnAFLDKGEFYIGSK                   | 2905.400 |
| 56 | Q9Y6R7                           | NPNNDQVFPnGTLAPSIPIWGGSWR                   | 2738.332 |
| 57 | A0A024R035                       | AVnITSENLIDDVVSLIR                          | 1972.060 |
| 58 | P02765                           | AALAAFNAQNnGSNFQLEEISR                      | 2366.137 |
| 59 | P02763;<br>P19652                | SVQEIQATFFYFTPnKTEDTIFLR                    | 2896.440 |
| 60 | G3V387                           | ADTHDEILEGLnFnLTEIPEAQIH                    | 2721.289 |
| 61 | Q5UGI6                           | AKVGQLQLSHnLSLVILVPQNLK                     | 2513.481 |
| 62 | D9ZGG2                           | NnATVHEQVGGPSLTSDLQAQSK                     | 2382.153 |
| 63 | A0A5C2FVK9                       | FSGSGSGTDFnLTISR                            | 1646.766 |
| 64 | B4E1B2;<br>P02787                | QQQHLLFGSnVTDcSGNFcLFR                      | 2516.108 |
| 65 | P04003                           | SRPAnHcVYFYGDEISFScHETSR                    | 2920.241 |
| 66 | A0A140VK00                       | DIVEYYnDSNGSHVLQGR                          | 2066.941 |
| 67 | P05160                           | KEHETcLAPELYnGnYSTTQK                       | 2485.119 |
| 68 | A0A384N669                       | LSHNELADSGIPGnSFnVSSLVELDLSYNK              | 3221.548 |
| 69 | A0A087WT59                       | ALGISPFHEHAEVVFTAnDSGPR                     | 2452.189 |
| 70 | P04217                           | FQSPAGTEALFELHnISVADSAnYScVYVDLKPPFGGSAPSER | 4630.172 |
| 71 | P01024                           | TVLTPATNHMGnVTFTIPANR                       | 2256.144 |
| 72 | Q5SQ11                           | WFSAGLASnSSWLR                              | 1582.765 |
| 73 | C0JYY2                           | FnSSYLQGTNQTGR                              | 1686.808 |
| 74 | Q5UGI6                           | VGQLQLSHnLSLVILVPQNLK                       | 2314.349 |
| 75 | A0A024R462                       | LDAPTNLQFVnETDSTVLVR                        | 2233.135 |
| 76 | F2Z3N2;<br>B4E1Z4                | QSVPAHFVALnGSK                              | 1455.759 |
| 77 | P0DOX6                           | THThISESHPhATFSAVGEASIScEDDDWSGER           | 3521.467 |
| 78 | G8DPX5                           | WVLYmVKNLPRMLIMLPLNNTQEIKncFFnITTELR        | 4612.384 |
| 79 | P02765                           | VcQDcPLLAPLnDTR                             | 1772.831 |

|     |                                  |                                                   |          |
|-----|----------------------------------|---------------------------------------------------|----------|
| 80  | A0A384N669                       | LHINHnnLTESVGPLPK                                 | 1884.981 |
| 81  | P00739;<br>P00738                | nLFLnHSEnATAK                                     | 1461.686 |
| 82  | C9JF17                           | ADGTVNQIEGEATPVnLTEPAK                            | 2255.104 |
| 83  | F5GXS0;<br>A0A140TA32            | nTTcQDLQIEVTVK                                    | 1649.805 |
| 84  | C0JYY2                           | QVLFLDTVYGncSTHFTVK                               | 2230.085 |
| 85  | P00739;<br>P00738                | NLFLnHSEnATAK                                     | 1460.702 |
| 86  | B4E1B2;<br>P02787                | QQQHFLFGSnVTDeSGnFcLFR                            | 2517.092 |
| 87  | A0A384NKS<br>6                   | LAnLTQGEDQYYLR                                    | 1684.818 |
| 88  | A0A384NKS<br>6                   | MLnTSSLLEQLNEQFNWVSR                              | 2410.171 |
| 89  | P01024                           | TVLTPATnHMGnVTFTIPANR                             | 2257.128 |
| 90  | A0A024R462                       | DQcIVDDITYnVnDTFHK                                | 2198.955 |
| 91  | F5GXS0;<br>B7Z1F8;<br>A0A140TA32 | FSDGLESnSSTQFEVK                                  | 1775.797 |
| 92  | P01008                           | SLTFnETYQDISELVYGAK                               | 2179.044 |
| 93  | V9HWI6                           | SDFASnccSInSPPLYcDSEIDAELK                        | 2994.233 |
| 94  | B1AKG0                           | LQNNENnIScVER                                     | 1590.718 |
| 95  | A0A384N669                       | LHINHnNLTESVGPLPK                                 | 1883.997 |
| 96  | D9IWP9                           | VYKPSAGnNSLYR                                     | 1469.738 |
| 97  | D3DNU8                           | LNAEnnATFYFK                                      | 1433.658 |
| 98  | F5GXS0;<br>A0A140TA32            | GLnVTLSSSTGRnGFK                                  | 1552.797 |
| 99  | P55058                           | VSnVScQASVSR                                      | 1294.606 |
| 100 | P02763                           | QDQcIYnTTYLnVQR                                   | 1917.865 |
| 101 | A0A8Q3WK<br>W7                   | ISEEnETTcYMGK                                     | 1562.635 |
| 102 | A8K9A9                           | IYSGILnLSDITK                                     | 1437.784 |
| 103 | Q08KA5                           | VIHTDnGTnFTSSAVKAAcWWAGIQQAFGIPYNPQSQGVV<br>ESMNK | 4911.314 |
| 104 | A0A7S5C406                       | GLEWIGDIInHTGSTNYNPSLK                            | 2317.110 |
| 105 | P01833                           | LSLLEEPGnGTFTVILNQLTSR                            | 2403.277 |
| 106 | A7LKQ7                           | TVFnKTnATFASPSGGDLRNTmRR                          | 2659.289 |
| 107 | A0A5C2GS96                       | GLEWVGEVKHSGSTnYSPSLK                             | 2276.119 |
| 108 | A0A286YFY<br>5                   | HYTnSSQDVTVPcR                                    | 1664.733 |
| 109 | A0A8Q3WK<br>W7                   | MDGASnVTcINSR                                     | 1425.610 |
| 110 | A0A384N669                       | LHInHnnLTESVGPLPK                                 | 1885.965 |
| 111 | C0JYY2                           | FVEGSHnSTVSLTTK                                   | 1607.791 |
| 112 | A0A384MDQ<br>7; P01009           | YLGnATAIFFLPDEGK                                  | 1756.879 |
| 113 | B1AKG0                           | LQNNEnnIScVER                                     | 1591.702 |
| 114 | B2R8I2                           | VIDFncTTSSVSSALANTK                               | 2015.959 |
| 115 | C9JSN9                           | DVQIIVFPEDGIHGFnFTR                               | 2205.097 |
| 116 | C0JYY2                           | LATALSLSNKFVEGSHnSTVSLTTK                         | 2606.367 |

|     |                       |                       |          |
|-----|-----------------------|-----------------------|----------|
| 117 | P01024                | TVLTPATnHMGnVTFTIPAnR | 2258.112 |
| 118 | P02763                | QDQcIYnTTYLNvQR       | 1916.881 |
| 119 | P01833                | VPGnVTAVLGETLK        | 1398.784 |
| 120 | P19652                | QNQcFYnSSYLNVQR       | 1921.850 |
| 121 | D3DNU8                | LNAENnATFYFK          | 1432.674 |
| 122 | K7EKQ5                | ALGFEnATQALGR         | 1348.686 |
| 123 | P00739;<br>P00738     | NLFLNHSEnATAK         | 1459.718 |
| 124 | A0A140VKE<br>5        | nGSGAVFPVAGADVQTLR    | 1759.897 |
| 125 | A5PL27                | EnLTAPGSDSAVFFEQGTTR  | 2127.983 |
| 126 | P27169                | HAnWTLTPLK            | 1181.631 |
| 127 | D6RHJ6                | EnISDPTSPLR           | 1229.601 |
| 128 | B2R9F2                | AQLLQGLGFnLTER        | 1560.838 |
| 129 | Q9Y5Y7                | ANQQLnFTEAK           | 1264.617 |
| 130 | Q6MZU6                | EEQFnSTFR             | 1158.506 |
| 131 | A0A5C2GL9<br>1        | FSGSGSGTDFTLnISR      | 1646.766 |
| 132 | Q59EA3                | EVYPWYnLTVEAK         | 1612.789 |
| 133 | P01871                | YKnnSDISSTR           | 1286.586 |
| 134 | C0JYY2                | FnSSYLQGTnQITGR       | 1687.792 |
| 135 | Q13201                | FNPGAESVVLsnSTLK      | 1663.854 |
| 136 | C0JYY2                | YDFnSSMLYSTAK         | 1527.667 |
| 137 | P03951                | VYSGILnQSEIK          | 1351.710 |
| 138 | A0A5C2FZC<br>1        | FnGSGSGTDFTLTISR      | 1660.781 |
| 139 | B4DZ36                | ISnSSDTVEcEcSENWK     | 2045.806 |
| 140 | P05546                | nLSMPLLPADPHK         | 1483.761 |
| 141 | F5GXS0;<br>A0A140TA32 | GLnVTLSSSTGR          | 1105.585 |
| 142 | D9IWP9                | LGnWSAMPScK           | 1251.550 |
| 143 | X5D8W0                | FQLLnFSSSELK          | 1413.726 |
| 144 | H0Y512                | AGPnGTLFVADAYK        | 1424.706 |
| 145 | P43652                | YAEDKFnETTEK          | 1475.654 |
| 146 | P19823                | GAFISnFSMTVDGK        | 1474.688 |
| 147 | D3DNU8                | ITYSIVQTncSK          | 1414.688 |
| 148 | P02790                | SWPAVGncSSALR         | 1405.653 |
| 149 | Q2EQH9                | LFNTTSTRESnK          | 1398.686 |
| 150 | B4DZ36                | IDSTGnVTnELR          | 1320.628 |
| 151 | A0A8Q3WK<br>W7        | SPDVInGSPISQK         | 1342.685 |
| 152 | P19652                | QNQcFYnSSYLnVQR       | 1922.834 |
| 153 | P80108                | nLTTSLTESVDR          | 1336.659 |
| 154 | P00734                | nFTENDLLVR            | 1221.611 |
| 155 | A0A140VJJ6            | DnccILDER             | 1195.472 |
| 156 | A0A384NKS<br>6        | EDALnETR              | 948.427  |
| 157 | A0A5C2GUH             | KPGASVnLScK           | 1161.593 |



|                  |                                   |                                 |          |
|------------------|-----------------------------------|---------------------------------|----------|
|                  | 3                                 |                                 |          |
| 158              | D6RAR4                            | cFLGnGTGYR                      | 1145.504 |
| 159              | A0A4W9A91<br>7                    | EEQYnSTFR                       | 1174.501 |
| 160              | D9IWP9                            | LGnWSAmPScK                     | 1267.545 |
| 161              | C9JF17                            | cIQAnYSLMEnGK                   | 1529.661 |
| 162              | A0A5C2GZB<br>1                    | FnGSGSGTDFTLK                   | 1331.611 |
| 163              | C9JSN9                            | FnDTEVLQR                       | 1122.543 |
| 164              | P03951                            | GINYnSSVAK                      | 1053.521 |
| 165              | P20851                            | EWDnTTTEcR                      | 1312.511 |
| 166              | P23142                            | cATPHGDnASLEATFVK               | 1818.833 |
| 167              | B4DZ36                            | IDSTGnVTNELR                    | 1319.644 |
| 168              | Q13201                            | LQnLTLPTnASIK                   | 1414.779 |
| 169              | P05156                            | FLNnGTcTAEGK                    | 1312.584 |
| 170              | P01871                            | nNSDISSTR                       | 994.444  |
| 171              | Q07954                            | FnSTEYQVVTR                     | 1344.643 |
| 172              | A0A024R6P0                        | KLInDYVKnGTR                    | 1422.759 |
| 173              | Q6MZU6                            | TKPREEQFnSTFR                   | 1640.803 |
| 174              | P43652                            | DIENFnSTQK                      | 1196.543 |
| 175              | J3QQX6                            | GnETLHYETFGK                    | 1396.638 |
| 176              | K7EKQ5                            | DAGVVcTnETR                     | 1222.537 |
| 177              | B7Z539                            | AnLSSQALR                       | 960.511  |
| 178              | V9GYL7                            | IGYSNnGSDWK                     | 1241.543 |
| 179              | Q9Y5Y7                            | KANQQLnFTEAK                    | 1392.712 |
| 180              | P43652                            | DIENFnSTQK                      | 1197.527 |
| 181              | A0A5C2GHF<br>1                    | LIIYnASNR                       | 1064.573 |
| 182              | A0A286YFJ8                        | EEQFnSTYR                       | 1174.501 |
| 183              | P29622                            | DFYVDEnTTVR                     | 1359.606 |
| 184              | P02768                            | nEcFLQHK                        | 1076.483 |
| 185              | P22792                            | AFGSNPnLTK                      | 1049.526 |
| 186              | B4DZ36                            | GlcNnSSDVR                      | 1008.441 |
| 187              | Q9BV40                            | nKTEDLEATSEHFK                  | 1649.765 |
| 188              | P01871                            | YKnNSDISSTR                     | 1285.602 |
| 189              | Q92954                            | nGTLVAFR                        | 878.473  |
| 190              | A0A0U4DF9<br>4                    | GPSSAGANTnSTPnR                 | 1432.630 |
| 191              | Q9J0Z8                            | KDWnDTLQnVTEK                   | 1592.744 |
| Uremia patient 1 |                                   |                                 |          |
| 1                | A0A384MDQ<br>7; G3V387;<br>P01009 | QLAHQSnSTNIFFSPVSIATAFAMLSLGTK  | 3182.619 |
| 2                | A0A384MDQ<br>7; P01009            | YLGnATAIFFLPDEGKLQHLENELTHDIITK | 3541.821 |
| 3                | P01008                            | LGAcnDTLQQLMEVFKFDTISEK         | 2688.290 |
| 4                | P36955                            | VTQnLTLIEESLTSEFIHDIDR          | 2574.293 |
| 5                | E9PFZ2                            | ELHHLQEQnVSNAFLDKGEFYIGSK       | 2904.416 |

|    |                                      |                                               |          |
|----|--------------------------------------|-----------------------------------------------|----------|
| 6  | B2RMS9                               | LPTQnITFQTESSVAEQEAEFQSPK                     | 2810.337 |
| 7  | A0A384MDQ<br>7; P01009               | ADTHDEILEGLNF <sub>n</sub> LTEIPEAQIHEGFQELLR | 3692.808 |
| 8  | A0A384N669                           | AFEnVTDLQWLILDHNLLENSK                        | 2613.320 |
| 9  | P01871                               | THTnISESHPnATFSAVGEASiCEDDWNSGER              | 3520.483 |
| 10 | A0A140VK00                           | DIVEYYnDSNGSHVLQGR                            | 2066.941 |
| 11 | Q9NPP6;<br>Q96K68;<br>A0A286YEY<br>5 | LSLHRPALEDLLLGSEAnLTcTLTGLR                   | 2964.582 |
| 12 | A8K9A9                               | LQAPLnYTEFQKPIcLPSK                           | 2248.168 |
| 13 | A0A140VK00                           | AREDIFMETLKDIVEYYnDSnGSHVLQGR                 | 3401.595 |
| 14 | P02765                               | AALAAFNAQnGsnFQLEEISR                         | 2366.137 |
| 15 | A0A024R462                           | LDAPTNLQFVnETDSTVLR                           | 2233.135 |
| 16 | Q06AH7                               | QQQHLFGSnVTDeSGnFcLFR                         | 2517.092 |
| 17 | A0A024R462                           | DQcIVDDITYNVnDTFHK                            | 2197.971 |
| 18 | A0A140VK00                           | DIVEYYnDSnGSHVLQGR                            | 2067.925 |
| 19 | P01023                               | VSnQTLSLFFTVLQDVPVR                           | 2164.165 |
| 20 | A0A024R035                           | AVnITSENLIDDVVSLIR                            | 1972.060 |
| 21 | P01023                               | SLGNVnFTVSAEALESQELcGTEVPSVPEHGR              | 3414.612 |
| 22 | P20851                               | LGHcPDPVLVNGEFSSSGPVnVSDK                     | 2612.230 |
| 23 | P02763;<br>P19652                    | SVQEIQATFFYFTPnKTEDTIFLR                      | 2896.440 |
| 24 | P20851                               | LGHcPDPVLVnGEFSSSGPVnVSDK                     | 2613.214 |
| 25 | Q06AH7                               | QQQHLFGSnVTDeSGnFcLFR                         | 2516.108 |
| 26 | P02766                               | ALGISPFHEHAEVVFTAnDSGPR                       | 2452.189 |
| 27 | P29622                               | SQILEGLGF <sub>n</sub> LTELSESDVHR            | 2345.162 |
| 28 | P02765                               | AALAAFNAQnnGsnFQLEEISR                        | 2367.121 |
| 29 | E9PFZ2                               | ELHHLQEQnVSnAFLDKGEFYIGSK                     | 2905.400 |
| 30 | Q5UGI6                               | GVTSVSQIFHSPDLAIRDTFVnASR                     | 2718.385 |
| 31 | A0A286YEY<br>5                       | HYTnSSQDVTVPcR                                | 1664.733 |
| 32 | Q5UGI6                               | VGQLQLSHnLSLVILVPQNLIK                        | 2314.349 |
| 33 | E9PFZ2                               | EHEGAIYPDnTTDFQR                              | 1893.825 |
| 34 | P02765                               | KVcQDcPLLAPLnDTR                              | 1900.926 |
| 35 | E9PFZ2                               | ELHHLQEQnVSNAFLDK                             | 2022.988 |
| 36 | P43652                               | nccNTENPPGcYR                                 | 1642.604 |
| 37 | A0A5C2GL9<br>1                       | FSGSGSGTDFTLnISR                              | 1646.766 |
| 38 | A0A140VK00                           | AREDIFMETLKDIVEYYNDSnGSHVLQGR                 | 3400.611 |
| 39 | P02765                               | AALAAFNAQnnGsnFQLEEISR                        | 2368.105 |
| 40 | P01023                               | SLGnVnFTVSAEALESQELcGTEVPSVPEHGR              | 3415.596 |
| 41 | P02790                               | nGTGHGnSTHHGPEYMR                             | 1853.762 |
| 42 | P02765                               | VcQDcPLLAPLnDTR                               | 1772.831 |
| 43 | Q6PEJ8                               | VVLHPnYSQVDIGLIK                              | 1795.995 |
| 44 | D9ZGG2                               | nnATVHEQVGGPSLTSDLQAQSK                       | 2383.137 |
| 45 | P02743                               | ESVTDHVNLIITPLEKPLQnFTLcFR                    | 2972.519 |

|    |                                   |                                        |          |
|----|-----------------------------------|----------------------------------------|----------|
| 46 | A0A384MDQ<br>7; G3V387;<br>P01009 | QLAHQSnStnIFFSPVSIATAFAMLSLGTK         | 3183.603 |
| 47 | A0A0G2JPR0<br>;<br>A0A140TA29     | nTTcQDLQIEVTVK                         | 1649.805 |
| 48 | C9JF17                            | ADGTVNQIEGEATPVnLTEPAK                 | 2255.104 |
| 49 | H2FE99                            | VLnKTVRATImTGDTPlnIFGRNVLTALGmSLNLPVAK | 4073.214 |
| 50 | A0A384NKS<br>6                    | mLnTSSLLEQLNEQFNWVSR                   | 2426.166 |
| 51 | E9PFZ2                            | EnLTAPGSDSAVFFEQGTTR                   | 2127.983 |
| 52 | A0A1U9X7H<br>4                    | SPYYnVSDEISFHcYDGYTLR                  | 2587.108 |
| 53 | C0JYY2                            | FEVDSPVYnATWSASLK                      | 1914.912 |
| 54 | P02763                            | QDQcIYnTTYLNVQR                        | 1916.881 |
| 55 | B1AKG0                            | LQNNEnnIscVER                          | 1591.702 |
| 56 | P43251                            | DVQIIVFPEDGIHGFnFTR                    | 2205.097 |
| 57 | B4DPC7                            | VVGVPYQGnATALFILPSEGK                  | 2161.154 |
| 58 | E9PFZ2                            | DVDKEFYLFPTVFDEnESLLEDNIR              | 3161.520 |
| 59 | P01008                            | LFGDKSLTFnETYQDISELVYGAK               | 2739.340 |
| 60 | P00734                            | YPHKPEInSTTHPGADLQENFcR                | 2712.247 |
| 61 | P19652                            | QnQcFYNSSYLVNQR                        | 1921.850 |
| 62 | C0JYY2                            | FnSSYLQGTNQTGR                         | 1686.808 |
| 63 | Q96PD5                            | LEPVHLQLQcMSQEQLAQVAAnATK              | 2808.402 |
| 64 | P04003                            | DQYVEPEnVTIQcDSGYGVVGPQSITcSGnR        | 3431.500 |
| 65 | Q6PEJ8;<br>P00739                 | NLFLnHSEnATAK                          | 1460.702 |
| 66 | A0A024R462                        | LDAPTnLQFVnETDSTVLVR                   | 2234.119 |
| 67 | A0A0G2JPR0<br>;<br>A0A140TA29     | FSDGLESnSSTQFEVK                       | 1775.797 |
| 68 | Q5SQ11                            | WFSAGLASnSSWLR                         | 1582.765 |
| 69 | P55058                            | VSnVScQASVSR                           | 1294.606 |
| 70 | P01833                            | VPGnVTAVLGETLK                         | 1398.784 |
| 71 | D9IWP9                            | VYKPSAGnNSLYR                          | 1469.738 |
| 72 | H0Y512                            | AGPnGTLFVADAYK                         | 1424.706 |
| 73 | A0A8Q3WK<br>W7                    | ISEEnETTcYMGK                          | 1562.635 |
| 74 | C0JYY2                            | QVFPGLnYcTSGAYSNASSTDSASYYP LTGDTR     | 3551.554 |
| 75 | P27169                            | VTQVYAE nGTVLQGSTVASVYK                | 2315.177 |
| 76 | B2R8I2                            | VIDFncTTSSVSSALANTK                    | 2015.959 |
| 77 | A0A384MDQ<br>7; P01009            | YLGnATAIFFLPDEGK                       | 1756.879 |
| 78 | Q9Y6L6                            | KYQEKDINASEnGSVMDEAnLESLnK             | 2929.326 |
| 79 | A0A384N669                        | LSHNELADSGIPGNSFnVSSLVELDLSYNK         | 3220.564 |
| 80 | A0A024R462                        | DQcIVDDITYnVnDTFHK                     | 2198.955 |
| 81 | C0JYY2                            | YDFnSSMLYSTAK                          | 1527.667 |
| 82 | P01008                            | SLTFnETYQDISELVYGAK                    | 2179.044 |
| 83 | V9HWI6                            | SDFASnccSINSPPLYcDSEIDAELK             | 2993.249 |

|     |                   |                                  |          |
|-----|-------------------|----------------------------------|----------|
| 84  | C0JYY2            | QVFPGLnYcTSGAYSnASSTDSASYPLTGDTR | 3552.538 |
| 85  | A0A384NKS<br>6    | LAnLTQGEDQYYLR                   | 1684.818 |
| 86  | P13473            | VASVININPnTTHSTGScR              | 2028.977 |
| 87  | B1AKG0            | LQNNENnIScVER                    | 1590.718 |
| 88  | C0JYY2            | FnSSYLQGTnQITGR                  | 1687.792 |
| 89  | Q6PEJ8;<br>P00739 | nLFLnHSEnATAK                    | 1461.686 |
| 90  | B4DZ36            | IDSTGnVTNELR                     | 1319.644 |
| 91  | I1TC98            | NVNVSKnSTGSSnGTARYnETYREmK       | 2926.312 |
| 92  | P27169            | HAnWTLTPLK                       | 1181.631 |
| 93  | P19652            | QNQcFYnSSYLnVQR                  | 1922.834 |
| 94  | T2CJQ1            | NAANTNnATTAATTTVAnTNISSGImMEK    | 2930.335 |
| 95  | D9IWP9            | VYKPSAGmnSLYR                    | 1470.722 |
| 96  | D3DNU8            | LNAENnATFYFK                     | 1432.674 |
| 97  | A0A5C2GF63        | KPGASVnVScK                      | 1147.578 |
| 98  | A0A8Q3WK<br>W7    | SPDVInGSPISQK                    | 1342.685 |
| 99  | P29622            | FLnDTMAVYEAK                     | 1402.656 |
| 100 | P80108            | nLTTSLTESVDR                     | 1336.659 |
| 101 | P55058            | EGHFYYnISEVK                     | 1486.685 |
| 102 | B4DZ36            | nHScSEGQISIFR                    | 1535.691 |
| 103 | D3DNU8            | ITYSIVQTncSK                     | 1414.688 |
| 104 | P43652            | YAEDKFnETTEK                     | 1475.654 |
| 105 | B4DZ36            | ISnSSDTVEcEcSENWK                | 2045.806 |
| 106 | D9IWP9            | LGnWSAMPScK                      | 1251.550 |
| 107 | Q6N093            | TKPREEQFnSTFR                    | 1640.803 |
| 108 | P02790            | SWPAVGncSSALR                    | 1405.653 |
| 109 | Q6N093            | EEQFnSTFR                        | 1158.506 |
| 110 | K7EKQ5            | ALGFEnATQALGR                    | 1348.686 |
| 111 | P20851            | EWDnTTTEcR                       | 1312.511 |
| 112 | D6RHJ6            | EnISDPTSPLR                      | 1229.601 |
| 113 | A0A384NKS<br>6    | EDALnETR                         | 948.427  |
| 114 | P22792            | AFGSNPnLTK                       | 1049.526 |
| 115 | B4DZ36            | IDSTGnVTnELR                     | 1320.628 |
| 116 | A0A286YFJ8        | EEQFnSTYR                        | 1174.501 |
| 117 | Q13201            | LQnLTLPTnASIK                    | 1414.779 |
| 118 | P01871            | YKnnSDISSTR                      | 1286.586 |
| 119 | C0JYY2            | FVEGSHnSTVSLTTK                  | 1607.791 |
| 120 | A0A140VKE<br>5    | nGSGAVFPVAGADVQTLR               | 1759.897 |
| 121 | P01871            | nNSDISSTR                        | 994.444  |
| 122 | A0A4W9A91<br>7    | EEQYnSTFR                        | 1174.501 |
| 123 | P00734            | nFTENDLLVR                       | 1221.611 |
| 124 | P05156            | FLNnGTcTAEGK                     | 1312.584 |

|                  |                               |                                |          |
|------------------|-------------------------------|--------------------------------|----------|
| 125              | P02790                        | ALPQPQnVTSLLGcTH               | 1736.864 |
| 126              | A8K9A9                        | IYSGILnLSDITK                  | 1437.784 |
| 127              | A0A5C2GHF1                    | LIIYnASNR                      | 1064.573 |
| 128              | A6XND1                        | GLcVnASAVSR                    | 1134.557 |
| 129              | D6RAR4                        | cFLGnGTGYR                     | 1145.504 |
| 130              | A0A7S5C1Q2                    | GRFnISR                        | 850.453  |
| 131              | O75144                        | LFnVTPQDEQK                    | 1319.648 |
| 132              | P02768                        | nEcFLQHK                       | 1076.483 |
| 133              | Q5NKV8                        | AnLTVVLLR                      | 999.620  |
| 134              | D3DNU8                        | LnAEnnATFYFK                   | 1434.642 |
| 135              | A0A024R6P0                    | YTGnASALFILPDQDK               | 1753.864 |
| 136              | P01008                        | WVSnKTEGR                      | 1077.532 |
| 137              | H6X2Q3                        | TnSSNGTTPPTSSGK                | 1594.719 |
| 138              | D9IWP9                        | LGnWSAmPScK                    | 1267.545 |
| 139              | B2R8I2                        | YWnDcEPPDSR                    | 1439.553 |
| 140              | A0A8S0MAG0                    | cATPHGDnASLEATFVK              | 1818.833 |
| 141              | P29622                        | DFYVDEnTTVR                    | 1359.606 |
| 142              | K7EKQ5                        | DAGVVcTnETR                    | 1222.537 |
| 143              | A0A5C2GUH3                    | KPGASVnLScK                    | 1161.593 |
| 144              | A8K9A9                        | GVnVcQETcTK                    | 1296.556 |
| 145              | F8WF14                        | WSDIWnATK                      | 1121.526 |
| 146              | Q92954                        | nGTLVAFR                       | 878.473  |
| 147              | B7Z2N4                        | VInETWAWK                      | 1147.578 |
| 148              | P12259                        | TWnQSIALR                      | 1089.569 |
| 149              | X5D8W0                        | VSLTnVSISDEGR                  | 1377.686 |
| 150              | A0A0G2JPR0<br>;<br>A0A140TA29 | GLnVTLSSSTGR                   | 1105.585 |
| 151              | B4DZ36                        | cInQSIcEK                      | 1152.502 |
| 152              | P80188                        | SYnVTSVLFR                     | 1186.610 |
| 153              | A0A087WTF6                    | DGQLLPSSnYSNIK                 | 1536.754 |
| 154              | F8WF14                        | EnETEIIK                       | 976.483  |
| 155              | A0A8Q3WKW7                    | mDGASnVTcINSR                  | 1441.605 |
| 156              | Q9Y5Y7                        | ANQQLnFTEAK                    | 1264.617 |
| Uremia patient 2 |                               |                                |          |
| 1                | G3V387;<br>P01009             | QLAHQSnSTNIFFSPVSIATAFAMLSLGTK | 3182.619 |
| 2                | P01008                        | LGAcnDTLQQLMEVFKFDTISEK        | 2688.290 |
| 3                | E9PFZ2                        | ELHHLQEQnVSNAFLDKGEFYIGSK      | 2904.416 |
| 4                | E9PFZ2                        | ELHHLQEQnVSnaFLDKGEFYIGSK      | 2905.400 |
| 5                | P20851                        | LGHCpDPVLVNGEFSSSGPvNVSDK      | 2612.230 |
| 6                | A0A140VK00                    | AREDIFMETLKDIVEYYnDSnGSHVLQGR  | 3401.595 |
| 7                | P00734                        | YPHKPEInSTTHPGADLQENFcR        | 2712.247 |

|    |                     |                                   |          |
|----|---------------------|-----------------------------------|----------|
| 8  | P01871              | THTnISESHPhATFSAVGEASiCEDDWNSGER  | 3520.483 |
| 9  | D9ZGG2              | nnATVHEQVGGPSLTSDLQAQSK           | 2383.137 |
| 10 | P36955              | VTQnLTLIEESLTSEFIHDIDR            | 2574.293 |
| 11 | A0A384N669          | LGSFEGLVnLTFIHLQHNR               | 2196.156 |
| 12 | D9ZGG2              | NnATVHEQVGGPSLTSDLQAQSK           | 2382.153 |
| 13 | A0A286Y5EY5; Q8NCL6 | LSLHRPALEDLLLGSSEAnLTcTLTGLR      | 2964.582 |
| 14 | P01009              | ADTHDEILEGLNFnLTEIPEAQIHEGFQELLR  | 3692.808 |
| 15 | A0A024R462          | DQcIVDDITYNVnDTFHK                | 2197.971 |
| 16 | P01009              | YLGnATAIFFLPDEGKQLHLENELTHDIITK   | 3541.821 |
| 17 | P05160              | KEHETcLAPELYnGnYSTTQK             | 2485.119 |
| 18 | C9JF17              | ADGTVNQIEGEATPVnLTEPAKLEVK        | 2724.394 |
| 19 | A0A140VK00          | AREDIFMETLKDIVEYYNDSnGSHVLQGR     | 3400.611 |
| 20 | P20851              | LGHcPDPVLVnGEFSSSGPVnVSDK         | 2613.214 |
| 21 | B4E1Z4              | SPYYnVSDEISFHcYDGYTLR             | 2587.108 |
| 22 | P49908              | EGYSnISYIVVNHQGISSR               | 2124.036 |
| 23 | A0A140VK00          | DIVEYYnDSNGSHVLQGR                | 2066.941 |
| 24 | Q5UGI6              | GVTSVSQIFHSPDLAIRDTFVnASR         | 2718.385 |
| 25 | A0A024R462          | LDAPTNLQFVnETDSTVLVR              | 2233.135 |
| 26 | A0A140VK00          | DIVEYYnDSnGSHVLQGR                | 2067.925 |
| 27 | P02765              | AALAAFNAQNnGSNFQLEEISR            | 2366.137 |
| 28 | E9PFZ2              | ELHHLQEQnVSNAFLDK                 | 2022.988 |
| 29 | P02765              | KVcQDcPLLAPLnDTR                  | 1900.926 |
| 30 | P01009              | YLGnATAIFFLPDEGKQLHLEnELTHDIITK   | 3542.805 |
| 31 | P04003              | FSLLGHASIScTVEEnETIGVWRPSPPTcEK   | 3373.619 |
| 32 | A0A096LPE2          | SRVYLQGLIDcYLFGnSSTVLEDSK         | 2865.398 |
| 33 | P01023              | VSnQTLSLFFTVLQDVPVR               | 2164.165 |
| 34 | P02763; P19652      | NEEYnKSVQEIQATFFYFTPnKTEDTIFLR    | 3674.754 |
| 35 | P01023              | SLGNVnFTVSAEALLESQELcGTEVPSVPEHGR | 3414.612 |
| 36 | A0A024R035          | AVnITSENLIDDVVSLIR                | 1972.060 |
| 37 | P02765              | VcQDcPLLAPLnDTR                   | 1772.831 |
| 38 | A0A384N669          | AFEnVTDLQWLILDHNLLENSK            | 2613.320 |
| 39 | C9JF17              | ADGTVNQIEGEATPVnLTEPAK            | 2255.104 |
| 40 | P02787              | QQQHFLFGSnVTDcSGnFcLFR            | 2517.092 |
| 41 | A0A5F9ZH15          | NPVGLIGAEnATGETDP SHSK            | 2094.994 |
| 42 | E9PFZ2              | EHEGAIYPDnTTDFQR                  | 1893.825 |
| 43 | A8K9A9              | LQAPLnYTEFQKPIcLPSK               | 2248.168 |
| 44 | P04003              | SRPAnHcVYFYGDEISFScHETSR          | 2920.241 |
| 45 | G3V387              | ADTHDEILEGLNFnLTEIPEAQIH          | 2720.305 |
| 46 | Q6PEJ8              | VVLHPnYSQVDIGLIK                  | 1795.995 |
| 47 | A0A384NKS6          | LAnLTQGEDQYYLR                    | 1684.818 |
| 48 | B2RMS9              | LPTQnITFQTESSVAEQEAEFQSPK         | 2810.337 |
| 49 | A0A024R462          | LDAPTnLQFVnETDSTVLVR              | 2234.119 |
| 50 | A0A0G2JPR0          | nTTcQDLQIEVTVK                    | 1649.805 |

|    |                            |                                                                 |          |
|----|----------------------------|-----------------------------------------------------------------|----------|
|    | ; P0C0L5                   |                                                                 |          |
| 51 | P27169                     | VTQVYAE <sub>n</sub> GTVLQGSTVASVYK                             | 2315.177 |
| 52 | A0A5C2GL9<br>1             | FSGSGSGTDFTL <sub>n</sub> ISR                                   | 1646.766 |
| 53 | C0JYY2                     | F <sub>n</sub> SSYLQGTNQTGR                                     | 1686.808 |
| 54 | Q6PEJ8;<br>P00739          | nLFL <sub>n</sub> HSE <sub>n</sub> ATAK                         | 1461.686 |
| 55 | P19652                     | QNQcFY <sub>n</sub> SSYLN <sub>V</sub> QR                       | 1921.850 |
| 56 | P43652                     | nccNTENPPGcYR                                                   | 1642.604 |
| 57 | P01023                     | SLG <sub>n</sub> V <sub>n</sub> FTVSAEALESQELcGTEVPSVPEHGR      | 3415.596 |
| 58 | P02790                     | ALPQPQ <sub>n</sub> VTSLLGcTH                                   | 1736.864 |
| 59 | P02765                     | AALAAFNAQ <sub>nn</sub> GSNFQLEEISR                             | 2367.121 |
| 60 | P02763                     | QDQcIY <sub>n</sub> TTYLN <sub>V</sub> QR                       | 1916.881 |
| 61 | C0JYY2                     | FVEGSH <sub>n</sub> STVSLT <sub>TK</sub>                        | 1607.791 |
| 62 | Q5UGI6                     | VGQLQLSH <sub>n</sub> LSLVILVPQNLK                              | 2314.349 |
| 63 | A0A087WT5<br>9             | ALGISPFHEHA <sub>EV</sub> VFTAnDSGPR                            | 2452.189 |
| 64 | C9JF17                     | ADGTV <sub>n</sub> QIEGEATPV <sub>n</sub> LTEPAK                | 2256.088 |
| 65 | A0A286Y <sub>EY</sub><br>5 | HYT <sub>n</sub> SSQDVTVPcR                                     | 1664.733 |
| 66 | A0A024R6P0                 | TL <sub>n</sub> QSSDELQLSMGNAMFVK                               | 2214.042 |
| 67 | A0A5F9ZH15                 | DVQII <sub>V</sub> FPEDGIHGFnFTR                                | 2205.097 |
| 68 | X6RLJ0                     | NPPMGGNVVIFD <sub>V</sub> ITNQEEPYQ <sub>n</sub> HSGR           | 3114.459 |
| 69 | P04275                     | HcDG <sub>n</sub> VSScGDHPSEGcFcPPDK                            | 2619.959 |
| 70 | C0JYY2                     | FEVDSPVY <sub>n</sub> ATWSASLK                                  | 1914.912 |
| 71 | P29622                     | SQILEGLGFnLTELSESDVHR                                           | 2345.162 |
| 72 | B2R8I2                     | VIDFncTTSSVSSALANTK                                             | 2015.959 |
| 73 | P19652                     | Q <sub>n</sub> QcFY <sub>n</sub> SSYLN <sub>V</sub> QR          | 1922.834 |
| 74 | Q8NCL6                     | LAGKPTHV <sub>n</sub> VSVVMAEVDGTcY                             | 2348.126 |
| 75 | E9PFZ2                     | EFYLFPTVFDE <sub>n</sub> ESLLEDNIR                              | 2704.303 |
| 76 | P13473                     | VASVINInP <sub>n</sub> TTHSTGScR                                | 2029.961 |
| 77 | C0JYY2                     | LATALSLS <sub>n</sub> KFVEGSH <sub>n</sub> STVSLT <sub>TK</sub> | 2607.351 |
| 78 | P13473                     | VASVININP <sub>n</sub> TTHSTGScR                                | 2028.977 |
| 79 | P04003                     | LSVDKDQYVEPE <sub>n</sub> VTIQcDSGYGVVGPQSITcSG <sub>n</sub> R  | 3973.807 |
| 80 | Q6PEJ8;<br>P00739          | NLFL <sub>n</sub> HSE <sub>n</sub> ATAK                         | 1460.702 |
| 81 | Q5SQ11                     | WFSAGLAS <sub>n</sub> SSWLR                                     | 1582.765 |
| 82 | P01833                     | VPG <sub>n</sub> VTAVLGETLK                                     | 1398.784 |
| 83 | P02763                     | QDQcIY <sub>n</sub> TTYL <sub>n</sub> VQR                       | 1917.865 |
| 84 | P55058                     | EGHFY <sub>n</sub> ISEVK                                        | 1486.685 |
| 85 | P36980                     | LQNNEN <sub>n</sub> IScVER                                      | 1590.718 |
| 86 | P02763;<br>P19652          | SVQEIQATFFYFTP <sub>n</sub> KTEDTIFLR                           | 2896.440 |
| 87 | P01009                     | ADTHDEILEGL <sub>n</sub> FnLTEIPEAQIHEGFQELLR                   | 3693.792 |
| 88 | P04003                     | DQYVEPE <sub>n</sub> VTIQcDSGYGVVGPQSITcSG <sub>n</sub> R       | 3431.500 |
| 89 | Q9Y5Y7                     | ANQQL <sub>n</sub> FTEAK                                        | 1264.617 |
| 90 | D9IWP9                     | VYKPSAG <sub>n</sub> NSLYR                                      | 1469.738 |

|     |                        |                                  |          |
|-----|------------------------|----------------------------------|----------|
| 91  | E9PFZ2                 | EnLTAPGSDSAVFFEQGTTR             | 2127.983 |
| 92  | C0JYY2                 | LATALSLSNKFVEGSHnSTVSLTTK        | 2606.367 |
| 93  | P36980                 | LQNNEnnIScVER                    | 1591.702 |
| 94  | C0JYY2                 | FnSSYLQGTnQITGR                  | 1687.792 |
| 95  | C0JYY2                 | YDFnSSMLYSTAK                    | 1527.667 |
| 96  | P02765                 | AALAAFnAQnnGSNFQLEEISR           | 2368.105 |
| 97  | V9HWI6                 | SDFASnccSINSPLYcDSEIDAELK        | 2993.249 |
| 98  | P0DOX6                 | THTnISESHFnATFSAVGEASICEDDDWSGER | 3521.467 |
| 99  | P55058                 | VSnVScQASVSR                     | 1294.606 |
| 100 | D9IWP9                 | LGnWSAMPScK                      | 1251.550 |
| 101 | D3DNU8                 | LNAENnATFYFK                     | 1432.674 |
| 102 | C0JYY2                 | VNQNLVYESGSLnFSK                 | 1799.881 |
| 103 | P02787                 | QQQHLFGSnVTDeSGNFcLFR            | 2516.108 |
| 104 | B4DVE1                 | GLnLTEDTYKPR                     | 1407.711 |
| 105 | A0A384N669             | LSHNELADSGIPGNSFnVSSLVELDLSYNK   | 3220.564 |
| 106 | P03951                 | LETTVnYTDSQRPIcLPSK              | 2223.096 |
| 107 | A0A0G2JPR0<br>; P0C0L5 | GLnVTLSSSTGRnGFK                 | 1552.797 |
| 108 | D3DNU8                 | LNAEnnATFYFK                     | 1433.658 |
| 109 | B4DPC7                 | VVGVPYQGnATALFILPSEGK            | 2161.154 |
| 110 | B4E1Z4                 | QSVPAHFVALnGSK                   | 1455.759 |
| 111 | B4DVE1                 | ALGFEnATQALGR                    | 1348.686 |
| 112 | A0A384N669             | LSHNELADSGIPGnSFnVSSLVELDLSYNK   | 3221.548 |
| 113 | P43652                 | nccnTENPPGcYR                    | 1643.588 |
| 114 | C0JYY2                 | QVFPGLnYcTSGAYSnASSTDSASYPLTGDTR | 3552.538 |
| 115 | B4DZ36                 | IDSTGnVTNELR                     | 1319.644 |
| 116 | A0A024R035             | cnGDnDcGDFSEDDcESEPRPPcR         | 3005.020 |
| 117 | A0A5J6A018             | VLAEAmSHAnSSIMMQRGnFR            | 2368.084 |
| 118 | A0A0G2JPR0<br>; P0C0L5 | FSDGLESnSSTQFEVK                 | 1775.797 |
| 119 | A0A384NKS<br>6         | mLnTSSLLEQLNEQFNWVSR             | 2426.166 |
| 120 | C0JYY2                 | VNQnLVYESGSLnFSK                 | 1800.865 |
| 121 | X5D8W0                 | VSLTnVSISDEGR                    | 1377.686 |
| 122 | P27169                 | HAnWTLTPLK                       | 1181.631 |
| 123 | A0A5F9ZH15             | YQFNTNVVFSNnGTLVDR               | 2088.999 |
| 124 | P01008                 | SLTFnETYQDISELVYGAK              | 2179.044 |
| 125 | Q15063                 | EVnDTLLVNELK                     | 1387.732 |
| 126 | C9JF17                 | cIQAnYSLMEEnGK                   | 1529.661 |
| 127 | P02790                 | SWPAVGncSSALR                    | 1405.653 |
| 128 | P05156                 | FLNnGTcTAEGK                     | 1312.584 |
| 129 | A0A8S0MAG<br>0         | cATPHGDnASLEATFVK                | 1818.833 |
| 130 | Q13201                 | FNPGAESVVLSnSTLK                 | 1663.854 |
| 131 | Q59EA3                 | EVYPWYnLTVEAK                    | 1612.789 |
| 132 | A0A8Q3WK<br>W7; A8K5T0 | SPDVInGSPISQK                    | 1342.685 |



|     |                        |                  |          |
|-----|------------------------|------------------|----------|
| 133 | P01009                 | YLGnATAIFFLPDEGK | 1756.879 |
| 134 | P80108                 | nLTTSLTESVDR     | 1336.659 |
| 135 | D6RHJ6                 | EnISDPTSPLR      | 1229.601 |
| 136 | A0A0G2JPR0<br>; P0C0L5 | GLnVTLSSSTGR     | 1105.585 |
| 137 | P22792                 | AFGSNPnLTK       | 1049.526 |
| 138 | A0A286YFJ8             | EEQFnSTYR        | 1174.501 |
| 139 | Q6N093;<br>Q6MZU6      | EEQFnSTFR        | 1158.506 |
| 140 | P20851                 | EWDnTTTEcR       | 1312.511 |
| 141 | H0Y512                 | AGPnGTLFVADAYK   | 1424.706 |
| 142 | A0A5C2G563             | DNSnNTLFLR       | 1194.575 |
| 143 | P05156                 | FLnnGTcTAEGK     | 1313.568 |
| 144 | A0A384NKS<br>6         | EDALnETR         | 948.427  |
| 145 | A0A8Q3WK<br>W7         | ISEEnETTeYMGK    | 1562.635 |
| 146 | A0A4W9A91<br>7         | EEQYnSTFR        | 1174.501 |
| 147 | B4DVE1                 | DAGVVcTnETR      | 1222.537 |
| 148 | A0A5C2GZB<br>1         | FnGSGSGTDFTLK    | 1331.611 |
| 149 | P00734                 | nFTENDLLVR       | 1221.611 |
| 150 | P43652                 | YAEDKFnETTEK     | 1475.654 |
| 151 | A0A5C2GHF<br>1         | LIYnASNR         | 1064.573 |
| 152 | P01871                 | nNSDISSTR        | 994.444  |
| 153 | Q13201                 | LQnLTLPTnASIK    | 1414.779 |
| 154 | P80188                 | SYnVTSVLFR       | 1186.610 |
| 155 | A0A087WTF<br>6         | DGQLLPSSnYSNIK   | 1536.754 |
| 156 | B4DVE1                 | AAIPSALDTnSSK    | 1275.643 |
| 157 | B4DZ36                 | nHScSEGQISIFR    | 1535.691 |
| 158 | A6XND1                 | GLcVnASAVSR      | 1134.557 |
| 159 | D9IWP9                 | LGnWSAmPScK      | 1267.545 |
| 160 | Q5NKV8                 | AnLTVVLLR        | 999.620  |
| 161 | P01008                 | WVSnKTEGR        | 1077.532 |
| 162 | B3KX75                 | DGEAFEInGTEDGR   | 1510.629 |
| 163 | P01871                 | YKnnSDISSTR      | 1286.586 |
| 164 | Q6GMX6;<br>Q7Z351      | EEQYnSTYR        | 1190.496 |
| 165 | B7Z2N4                 | VInETWAWK        | 1147.578 |
| 166 | V9HWI6                 | LcDnLSTK         | 951.445  |
| 167 | A0A5C2FVK<br>9         | FSGSGSGTDFnLTISR | 1646.766 |
| 168 | A0A5F9ZH15             | FnDTEVLQR        | 1122.543 |
| 169 | A0A024R6P0             | YTGnASALFILPDQDK | 1753.864 |
| 170 | H9DQG0                 | IEnYTGIIYnLIK    | 1555.825 |
| 171 | Q92954                 | nGTLVAFR         | 878.473  |

|     |            |                                                     |          |
|-----|------------|-----------------------------------------------------|----------|
| 172 | P29622     | DFYVDEnTTVR                                         | 1359.606 |
| 173 | P01871     | YKnNSDISSTR                                         | 1285.602 |
| 174 | Q3LX85     | NIIVQLNESVTIncTRPYnnTRQGTHIGPGQALYTTKITGDIR         | 4830.448 |
| 175 | A0A1C3J7N4 | ISGAARnSSSFITGSVARAVPHLGYAMAAGRFGWGLAHA<br>PAAVAmSR | 4715.383 |

**Table S7.** Details information of the identified phosphopeptides enriched by CH-Dha@Ti<sup>4+</sup> from serum trypsin digests. s, t, y: Phosphorylation site.

| No.              | Protein Accessions | Group | Sequence                            | MH <sup>+</sup> [Da] |
|------------------|--------------------|-------|-------------------------------------|----------------------|
| Normal control 1 |                    |       |                                     |                      |
| 1                | P02671             |       | NPSsAGSWNSGSSGPGSTGNR               | 2043.815             |
| 2                | P02671             |       | GsESGIFTNTK                         | 1220.519             |
| 3                | P04114             |       | VREsDEETQIK                         | 1413.626             |
| 4                | O14791             |       | VTEPISAEsGEQVER                     | 1710.758             |
| 5                | P00747             |       | QLGAGsIEEcAAK                       | 1413.608             |
| 6                | P02768             |       | TcVADEsAENcDK                       | 1578.545             |
| 7                | P02671             |       | EsSSHHPGIAEFPSR                     | 1717.733             |
| 8                | P01042             |       | EsNEELTEScETK                       | 1635.609             |
| 9                | P01042             |       | ETTcSKEsNEELTEScETK                 | 2341.905             |
| 10               | P01042             |       | EtTcSKESNEELTEScETKK                | 2470.000             |
| 11               | P01008             |       | ATEDEGsEQKIPEATNR                   | 1954.839             |
| 12               | P02765             |       | cDSSPDsAEDVR                        | 1417.494             |
| 13               | P02765             |       | cDSSPDsAEDVRK                       | 1545.589             |
| 14               | P08833             |       | AQETsGEEISK                         | 1258.520             |
| 15               | P19827             |       | AAIsGENAGLVR                        | 1237.594             |
| 16               | P02748             |       | AEQccEETAAsSISLHGK                  | 1986.793             |
| 17               | P02652             |       | VKsPELQAEAK                         | 1279.629             |
| 18               | Q92954-6           |       | VIEsEEITEVK                         | 1355.634             |
| 19               | P02652             |       | sKEQLTPLIK                          | 1236.660             |
| 20               | P11464             |       | sDPVtLNVLyGPDLP                     | 1995.827             |
| 21               | P49908             |       | LPTDsELAPR                          | 1178.545             |
| 22               | P10645             |       | GGKsGELEQEEER                       | 1527.632             |
| 23               | Q2MV58-3           |       | FPsSLTSSLcTDNNPAGQAYWFtPVIPALWEAEAR | 4056.792             |
| 24               | P02671             |       | GGSTSYGTGsETESPR                    | 1652.644             |
| 25               | Q14515             |       | SSsQELGLK                           | 1028.466             |
| 26               | P02671             |       | QFTsSTSYNR                          | 1270.510             |
| 27               | Q9BUN1             |       | FIANsQEPEIR                         | 1383.630             |
| 28               | Q6P047             |       | FtEELLR                             | 987.455              |
| 29               | Q92954-6           |       | KVIEsEEITEVK                        | 1483.729             |
| 30               | Q92954-6           |       | cFEsFER                             | 1054.370             |
| 31               | Q9Y680             |       | sYQDAVLEDIFK                        | 1507.672             |
| 32               | P06727             |       | ISAsAEELR                           | 1055.477             |
| Normal control 2 |                    |       |                                     |                      |
| 1                | P02679             |       | QVRPEHPAETEDsLYPEDDL                | 2583.092             |
| 2                | Q6PIL8; P0DOX7     |       | VDNALQsGNSQESVTEQDSK                | 2215.935             |
| 3                | A0A384MDQ7; P01009 |       | YLGNAAtAIFFLPDEGK                   | 1835.862             |
| 4                | A0A5C2GFR0         |       | EEQVVEsGGGLVQPGGSLR                 | 1977.928             |
| 5                | A0A5C2GEV4         |       | EVQLAVsGGGLVQPGGSLR                 | 1903.964             |
| 6                | A0A5C2GH73         |       | DIHVtQSPSSVSASVGDR                  | 1921.865             |

|                  |                                                                                                                                                                                                |                                  |          |
|------------------|------------------------------------------------------------------------------------------------------------------------------------------------------------------------------------------------|----------------------------------|----------|
| 7                | A0A5C2FWT5                                                                                                                                                                                     | DsGVPDRmSGSGSGTDFTLKISR          | 2466.097 |
| 8                | A0A5C2GS75                                                                                                                                                                                     | ASQSVRQsLAWYQQKPGQAPR            | 2466.204 |
| 9                | A0A5C2G2K8                                                                                                                                                                                     | AIGIPDRFsGNESGTDFLTISR           | 2534.192 |
| 10               | A0A384MDQ7;<br>P01009                                                                                                                                                                          | ADtHDEILEGLNFnLTeIPEAQIHEGFQELLR | 3771.79  |
| 11               | S5ZFI0                                                                                                                                                                                         | VAEDLNlGNPDVSIpWtHK              | 2185.033 |
| 12               | A0A059XHM5                                                                                                                                                                                     | sTRLVIGFLSLIWDDLr                | 2084.094 |
| 13               | A0A7S5BYK1                                                                                                                                                                                     | EVQLVAsGGGVVRPGGSLR              | 1917.991 |
| 14               | B2RMS9                                                                                                                                                                                         | LPtQNITFQTESSVAEQEAEFQSPK        | 2889.319 |
| 15               | A0A5C2GVB5                                                                                                                                                                                     | EVRLAEsGGGLVQPGGSLR              | 1961.98  |
| 16               | A0A7S5C199                                                                                                                                                                                     | EEALVEsGGGLVQPGGSLR              | 1976.932 |
| 17               | D3DNU8                                                                                                                                                                                         | ETTcSKEsNEELTEScETK              | 2341.905 |
| 18               | A0A5C2GM92                                                                                                                                                                                     | AtGFSDRfSGSGSGTDFLTISR           | 2447.087 |
| 19               | A0A5C2FY67                                                                                                                                                                                     | FsGSGSGTGFTLTISR                 | 1654.747 |
| 20               | P02679                                                                                                                                                                                         | FGsYcPTTcGIADFLSTYQTK            | 2497.045 |
| 21               | P02763                                                                                                                                                                                         | QDQcIyNTTYLNVQR                  | 1995.863 |
| 22               | A0A5C2G5A9                                                                                                                                                                                     | EVQLVEsGGGLGKPGGSLR              | 1919.959 |
| 23               | A0A5C2G6U1                                                                                                                                                                                     | DIQMTQsPPSLASVgDR                | 2010.884 |
| 24               | A0A5C2GSD5;<br>A0A7S5EX31;<br>A0A7S5C2T1;<br>A0A5C2GMJ1;<br>A0A5C2GN12;<br>A0A5C2GKB8;<br>A0A5C2GKI6;<br>A0A7S5C533;<br>A0A7S5C4B7;<br>A0A5C2GJY3;<br>A0A7S5BYP3;<br>A0A5C2GMK1;<br>A0A7S5EYK0 | EVQLVEsGGGIVQPGGSLR              | 1961.969 |
| 25               | A0A5C2FVM5                                                                                                                                                                                     | AsQSLRGDLAWYQQKPGQAPR            | 2437.177 |
| 26               | A2SZP6                                                                                                                                                                                         | LlyELLEVSQNQQDK                  | 1899.91  |
| 27               | A0A5C2GMJ1                                                                                                                                                                                     | mVyLQmNSLR                       | 1366.589 |
| 28               | A0A510CLA2                                                                                                                                                                                     | EyALFYKLDVVSINNTSYR              | 2375.132 |
| 29               | A0A7S5BYP3                                                                                                                                                                                     | LscAASGITfSDFAMHWVR              | 2235.972 |
| 30               | A0N7I9                                                                                                                                                                                         | ALQGLIHemDDWGKGtAVTVSSASTK       | 2798.307 |
| 31               | P02768; F6KPG5                                                                                                                                                                                 | cctESLVNRRPcFSALEVDETYVPK        | 3110.378 |
| 32               | P01008                                                                                                                                                                                         | SLtFNETYQDISELVYGAK              | 2258.026 |
| Uremia patient 1 |                                                                                                                                                                                                |                                  |          |
| 1                | A0A5C2G2U6                                                                                                                                                                                     | QSIssWLAWYQQKPGK                 | 2066.914 |
| 2                | A0A5C2GDW9                                                                                                                                                                                     | LScAASGFPLsK                     | 1317.591 |
| 3                | A0A5C2G966                                                                                                                                                                                     | EVHLAEsGGGFVQPGGSLR              | 1976.923 |
| 4                | A0A5C2FVL3;<br>A0A7T0PXY5                                                                                                                                                                      | AtGIPDRIsGSGSGTDFLTISR           | 2469.106 |
| 5                | A0A5C2FUX9                                                                                                                                                                                     | AtGIPDRfTGSGSGTDFSLTISR          | 2423.124 |
| 6                | A0A5C2GTD7                                                                                                                                                                                     | AtDVPDRfSGSGSGTDFLTISR           | 2467.114 |
| 7                | P02765                                                                                                                                                                                         | cDSSPDsAEDVR                     | 1417.494 |
| 8                | B2RMS9                                                                                                                                                                                         | LPtQNITFQTESSVAEQEAEFQSPK        | 2889.319 |

|                  |                                                                                                                     |                              |          |
|------------------|---------------------------------------------------------------------------------------------------------------------|------------------------------|----------|
| 9                | A0A5C2FW16                                                                                                          | AsQSVSTNLIWYQQKPGQAPR        | 2439.182 |
| 10               | P02768                                                                                                              | sHcIAEVENDEmPADLPsLAADFVESK  | 3150.272 |
| 11               | A0A5C2GJR6                                                                                                          | EVQLLEsGGGLVKPGGSLR          | 1976.021 |
| 12               | A0A7S5BYK7;<br>A0A5C2GP27;<br>A0A5C2GKN5;<br>A0A5C2GN03;<br>A0A5C2GRL5;<br>A0A7S5BZS9;<br>A0A7S5BZS1;<br>A0A7S5C121 | EVQLVEsGGGIVQPGGSLR          | 1961.969 |
| 13               | Q9DHT6                                                                                                              | INtESLVNR                    | 1125.530 |
| 14               | P02768                                                                                                              | cctESLVNRRPcFSALEVDETYVPK    | 3110.378 |
| 15               | B2RMS9                                                                                                              | FSSHVGGtLGQFYQEVWLGSPAASDDGR | 3048.352 |
| 16               | P42684                                                                                                              | TPSGDLAItEK                  | 1211.556 |
| 17               | A0A5C2GNZ6                                                                                                          | EVQLVVsGGVVARPGGSLR          | 1917.991 |
| 18               | A0A5C2GUU4                                                                                                          | AAELLESsGGGvVQPGGSLR         | 1906.891 |
| 19               | F1AXI9                                                                                                              | AtVRPLAVAR                   | 1133.619 |
| 20               | A2NZ55                                                                                                              | QVQLQEsGGGLVQPGGSLR          | 2031.986 |
| 21               | A0A5C2GEV4                                                                                                          | EVQLAVsGGGLVQPGGSLR          | 1903.964 |
| Uremia patient 2 |                                                                                                                     |                              |          |
| 1                | A0A5C2GYW0                                                                                                          | LsGVPDRFSGSGSTDFTLKISR       | 2464.187 |
| 2                | A0A5C2GMV6                                                                                                          | EVQLVEsGGGVAKPGGSLR          | 1919.959 |
| 3                | A0A5C2GM92                                                                                                          | AtGFSDRFSGSGSTDFTLTISR       | 2447.087 |
| 4                | A0A5C2GEX6                                                                                                          | DLQLVEsGGGLVKPGGSLR          | 1962.006 |
| 5                | Q6MZW0                                                                                                              | GGLFDVWGPgtTVTSSASPTSPK      | 2428.143 |
| 6                | A0A5C2FYB1                                                                                                          | GTDIPDRFsGSGSTDFTLTISR       | 2467.114 |
| 7                | A0A5C2G2K8                                                                                                          | AIGIPDRFsGNESGTDFTLTISR      | 2534.192 |
| 8                | A0A7S5C1C0                                                                                                          | VTISVDAsKNLLSLK              | 1667.898 |
| 9                | P01009                                                                                                              | YLGNAtAIFFLPDEGK             | 1835.862 |
| 10               | Q6PIL8                                                                                                              | VDNALQSGNsQESVTEQDSK         | 2215.935 |
| 11               | A0A5C2FUR6                                                                                                          | FsGVPDRFTGSGAGTDFTLTISR      | 2469.145 |
| 12               | B4DTR2                                                                                                              | mPsRtGTSTLTVAVcK             | 1884.800 |
| 13               | U5LGW0                                                                                                              | VTEPIsAESGEQVER              | 1710.758 |
| 14               | A0A5C2GBE8                                                                                                          | SLsAVVFGGGTK                 | 1202.582 |
| 15               | P02765                                                                                                              | CDSSPDsAEDVR                 | 1417.494 |
| 16               | D3DNU8                                                                                                              | ETtcSKESNEELTEScETK          | 2341.905 |
| 17               | P19652                                                                                                              | QNQcFyNSSYLNVQR              | 2000.832 |
| 18               | P0DOX5                                                                                                              | IRDtAmFFAHWGQgtLVTSSASTK     | 2887.289 |
| 19               | A0A5C2GNZ6                                                                                                          | EVQLVVsGGVVARPGGSLR          | 1917.991 |
| 20               | A0A5C2GFR0                                                                                                          | EEQVVEsGGGLVQPGGSLR          | 1977.928 |
| 21               | A0A5C2GEA0                                                                                                          | GLEWVsSISGSGAVKYYADSVK       | 2383.122 |
| 22               | A0A5C2GUZ0                                                                                                          | FsGVPDRFSGSGAATDFTLTISR      | 2469.145 |
| 23               | A0A5C2FTR7                                                                                                          | DIRLtQSPSSVSASVGDR           | 1996.934 |
| 24               | A0A5C2G7L5                                                                                                          | FSGsNSGKTATLTISR             | 1706.811 |
| 25               | B2R8I2                                                                                                              | VIDFNctTSSVSSALANTK          | 2094.941 |
| 26               | A0A097GSS5                                                                                                          | LDIVQLNDKsNNNTFSK            | 2029.959 |
